1 **Title:** Osteopontin promotes survival of intestinal intraepithelial lymphocytes and  
2 protects against colitis

3

4 **Authors:** Ali Nazmi,<sup>1</sup> Michael J. Greer,<sup>2</sup> Kristen L. Hoek,<sup>1</sup> M. Blanca Piazuelo,<sup>3</sup> Joern-  
5 Hendrik Weitkamp,<sup>4</sup> and Danyvid Olivares-Villagómez<sup>1,5,6</sup>

6

7 <sup>1</sup>Department of Pathology, Microbiology and Immunology, Vanderbilt University Medical  
8 Center, A5301 Medical Center North, Nashville, Tennessee 37232, USA; <sup>2</sup>Department  
9 of Biomedical Informatics, Vanderbilt University, Nashville, Tennessee, 37232, USA;  
10 <sup>3</sup>Department of Medicine, Vanderbilt University Medical Center, 1030 MRBIV, Nashville,  
11 Tennessee 37232, USA; <sup>4</sup>Department of Pediatrics, Vanderbilt University Children's  
12 Hospital, 111111 Doctor's Office Tower, Nashville, Tennessee 37232, USA; <sup>5</sup>Vanderbilt  
13 Institute for Infection, Immunology and Inflammation, Vanderbilt University Medical  
14 Center, A5301 Medical Center North, Nashville, Tennessee 37232, USA; <sup>6</sup>ORCID,  
15 0000-0002-1158-8976.

16

17 **Corresponding author:** Danyvid Olivares-Villagómez, Department of Pathology,  
18 Microbiology and Immunology, Vanderbilt University Medical Center, A5301 Medical  
19 Center North, Nashville, Tennessee 37232, USA. Telephone, 615-936-0134; email,  
20 danyvid.olivares-villagomez@vumc.org

21

22 Ali Nazmi and Michael J. Greer contributed equally to this report.

23

24

25

26 **Abstract**

27 Intestinal intraepithelial lymphocytes (IEL) comprise a diverse population of cells  
28 residing in the epithelium at the interface between the intestinal lumen and the sterile  
29 environment of the lamina propria. Because of this anatomical location, IEL are  
30 considered critical components of intestinal immune responses. Indeed, IEL are  
31 involved in many different immunological processes ranging from pathogen control to  
32 tissue stability. However, maintenance of IEL homeostasis is incompletely understood.  
33 In this report we present evidence that osteopontin, a glycoposphoprotein with diverse  
34 roles in biomineralization, cell-mediated immunity, and inflammation, is important for  
35 maintaining normal levels of IEL. Mice in which the osteopontin gene (*Spp-1*) is  
36 disrupted present decreased levels of IEL subtypes, such as TCR $\alpha\beta$  and TCR $\gamma\delta$  IEL in  
37 the intestine, an effect not observed for lymphocytes in other immune compartments  
38 such as spleen or lamina propria, indicating an epithelium-specific effect. *In vitro*  
39 experiments show that mouse and human IEL survival is improved by culture with  
40 recombinant osteopontin. CD44, a ligand for osteopontin, is conspicuously expressed in  
41 IEL, including mucosal regulatory T cells. We present *in vitro* and *in vivo* evidence  
42 supporting a role for the osteopontin-CD44 interaction in IEL and regulatory T cell  
43 homeostasis, with implications in the development of intestinal inflammation.

44

## 45 Introduction

46 One of the largest immunological compartments in the body is comprised of  
47 intraepithelial lymphocytes (IEL), a group of immune cells interspaced between the  
48 monolayer of intestinal epithelial cells (IEC). IEL can be divided into two groups based  
49 on T cell receptor (TCR) expression.<sup>1, 2, 3</sup> TCR<sup>+</sup> IEL express  $\alpha\beta$  or  $\gamma\delta$  chains. TCR $\alpha\beta$ <sup>+</sup>  
50 IEL can be further subdivided into different populations such as TCR $\alpha\beta$ <sup>+</sup>CD4<sup>+</sup>,  
51 TCR $\alpha\beta$ <sup>+</sup>CD4<sup>+</sup>CD8 $\alpha\alpha$ <sup>+</sup>, TCR $\alpha\beta$ <sup>+</sup>CD8 $\alpha\beta$ <sup>+</sup>, and TCR $\alpha\beta$ <sup>+</sup>CD8 $\alpha\beta$ <sup>+</sup>CD8 $\alpha\alpha$ <sup>+</sup> cells. TCR<sup>neg</sup> IEL  
52 comprise innate lymphoid cells (ILC)<sup>4, 5, 6</sup> and lymphocytes characterized by expression  
53 of intracellular CD3 $\gamma$  chains (iCD3<sup>+</sup>), some of which express CD8 $\alpha\alpha$  (iCD8 $\alpha$  cells).<sup>7, 8</sup>

54 Because of their anatomical location, IEL function as sentinels between the  
55 antigenic contents of the intestinal lumen and the sterile environment under the basal  
56 membrane of the epithelium. Indeed, TCR $\gamma\delta$  IEL surveil for pathogens,<sup>9</sup> secrete  
57 antimicrobials conferring protection against pathobionts,<sup>10</sup> and protect from intestinal  
58 inflammation.<sup>11</sup> TCR $\gamma\delta$  IEL are also involved in protecting the integrity of damaged  
59 epithelium after dextran sodium sulphate (DSS)-induced colitis,<sup>12</sup> and are responsible,  
60 along with other IEL, for preserving IEC homeostasis.<sup>13, 14</sup> Other IEL, such as  
61 conventional effector CD8 T cells that migrate into the epithelium, can protect against  
62 *Toxoplasma* infection,<sup>15</sup> and reside in this organ as memory cells.<sup>16, 17</sup> IEL such as  
63 TCR $\alpha\beta$ <sup>+</sup>CD4<sup>+</sup>CD8 $\alpha\alpha$ <sup>+</sup> cells can prevent development of colitis in an adoptive transfer  
64 model.<sup>18</sup> TCR<sup>neg</sup> IEL such as iCD8 $\alpha$  cells confer protection against *Citrobacter*  
65 *rodentium* infection and may protect against necrotizing enterocolitis in neonates,<sup>8</sup> but  
66 these cells can also promote intestinal inflammation in some experimental conditions.<sup>19</sup>  
67 iCD3<sup>+</sup> IEL are involved in malignancies associated with celiac disease.<sup>7</sup>

68 Osteopontin is a glycosylated phosphoprotein, encoded by the Spp-1 gene,  
69 originally characterized as part of the rat bone matrix.<sup>20, 21</sup> Osteopontin is a versatile  
70 molecule involved in many physiological processes, that include immunological roles,  
71 such as macrophage chemotaxis,<sup>22</sup> induction of Th1 responses,<sup>23</sup> suppression of T cell  
72 activated-induced cell death,<sup>24</sup> inhibition of natural killer (NK) cell apoptosis and  
73 promotion of NK cell responses,<sup>25</sup> and modulation of dendritic cell function.<sup>26</sup> The role of  
74 osteopontin during intestinal inflammation is diverse. For example, Spp-1-deficient mice  
75 present with milder disease in the trinitrobenzene sulphonic acid<sup>27</sup> and DSS models of

76 colitis.<sup>28</sup> In humans with inflammatory bowel diseases (IBD), plasma osteopontin is  
77 significantly increased as compared to normal individuals.<sup>29, 30</sup> Some reports indicate  
78 that osteopontin is downregulated in the mucosa of Crohn's disease (CD) patients,<sup>31</sup>  
79 whereas other groups have reported higher osteopontin expression in the intestines of  
80 individuals with CD and ulcerative colitis (UC) compared with healthy controls.<sup>29, 32</sup>  
81 Because of its potential involvement in IBD, this molecule could be a potential  
82 biomarker for IBD,<sup>33</sup> and has been explored as a potential therapeutic target in clinical  
83 trials.<sup>34</sup> These reports clearly underscore the importance of osteopontin in intestinal  
84 inflammation and warrant further investigation of this molecule in mucosal immune  
85 responses.

86         Recently, it was reported that the frequency and number of TCR $\gamma\delta$  IEL were  
87 reduced in osteopontin-deficient mice, while TCR $\alpha\beta$  IEL numbers remained similar in  
88 comparison to wild type controls.<sup>35</sup> However, *in vitro* neutralization of IEL-derived  
89 osteopontin resulted in decreased survival of TCR $\gamma\delta$  and TCR $\alpha\beta$  IEL,<sup>35</sup> confounding the  
90 *in vivo* results. Moreover, because of the IEL diversity present in the intestine, more  
91 detailed analysis is required to determine the survival requirements of different IEL  
92 populations. Herein, we provide substantial *in vitro* and *in vivo* evidence indicating that  
93 osteopontin promotes the survival of TCR $\gamma\delta$  and TCR $\alpha\beta$  IEL, including subpopulations  
94 of these cells, such as: TCR $\alpha\beta^+$ CD4<sup>+</sup>, TCR $\alpha\beta^+$ CD4<sup>+</sup>CD8 $\alpha\alpha^+$  and TCR $\alpha\beta^+$ CD8 $\alpha\alpha^+$  cells.  
95 We also show that the survival effect is not only confined to murine IEL, but osteopontin  
96 also promotes the survival of human IEL. Additionally, osteopontin promotes a pro-  
97 apoptotic transcriptional profile, underscoring its role as a survival stimulus. Moreover,  
98 we show that the effect of osteopontin in IEL survival is mediated by CD44, a known  
99 receptor for osteopontin conspicuously expressed by IEL and regulatory T cells in the  
100 intestinal mucosa. Lastly, using two different models of intestinal inflammation, we  
101 present evidence indicating that the lack of osteopontin results in increased disease  
102 susceptibility.

103  
104  
105  
106

## 107 **Results**

### 108 *Osteopontin-deficient mice contain a reduced IEL compartment.*

109 To determine the role of osteopontin in IEL homeostasis, we analyzed the IEL  
110 compartment of wild-type (WT) and *Spp-1<sup>-/-</sup>* mice. Flow cytometry studies revealed a  
111 reduction in the proportion of total IEL in the small intestine of *Spp-1<sup>-/-</sup>* mice compared  
112 with WT mice (Fig. 1a, FSC vs SCC dot plots). The percentages of certain TCR $\beta^+$  IEL  
113 subpopulations, such as TCR $\beta^+$ CD4 $^+$  and TCR $\beta^+$ CD4 $^+$ CD8 $\alpha^+$  were reduced in *Spp-1<sup>-/-</sup>*  
114 mice, whereas others, such as TCR $\beta^+$ CD8 $\alpha^+$  cells were similar among both groups of  
115 mice (Fig. 1a dot plots). The percentages of TCR $\gamma\delta^+$  and TCR $^{\text{neg}}$  IEL, such as iCD8 $\alpha$   
116 cells, were similar between WT and *Spp-1<sup>-/-</sup>* mice. In terms of total cell numbers, *Spp-1<sup>-/-</sup>*  
117 mice presented a significant decrease in TCR $\gamma\delta^+$  IEL, corroborating the observations  
118 made by others (Fig 1a graphs).<sup>35</sup> However, we observed total cell number reduction in  
119 TCR $\beta^+$  IEL due to the decline of TCR $\beta^+$ CD4 $^+$ , TCR $\beta^+$ CD8 $\alpha^+$  and TCR $\beta^+$ CD4 $^+$ CD8 $\alpha^+$  in  
120 the small intestine IEL of osteopontin-deficient mice. The numbers of TCR $^{\text{neg}}$  IEL and  
121 the subpopulation iCD8 $\alpha$  cells were similar among WT and *Spp-1<sup>-/-</sup>* mice (Fig 1a  
122 graphs). While colon IEL numbers from *Spp-1<sup>-/-</sup>* mice showed a similar pattern as in the  
123 small intestine, the numbers of TCR $^{\text{neg}}$  IEL from these mice were significantly reduced  
124 as compared with WT mice (Fig. 1b). Interestingly, osteopontin-deficiency did not affect  
125 spleen T lymphocytes (Fig. 1c), or lamina propria CD19 $^+$ , TCR $\beta^+$ CD4 $^+$  and TCR $\beta^+$ CD8 $^+$   
126 cells (Fig. 1d), suggesting that the major influence of this molecule is confined to the  
127 intestinal IEL compartment.

128

### 129 *Increased apoptosis and decreased cellular division in IEL from osteopontin-deficient* 130 *mice.*

131 To investigate whether the reduction in IEL numbers in *Spp-1<sup>-/-</sup>* mice was due to  
132 increased cell death, we determined the levels of early/late apoptosis and necrosis. As  
133 shown in Fig. 2a, all IEL populations isolated from WT and *Spp-1<sup>-/-</sup>* mice analyzed  
134 presented similar levels of cells in early apoptosis (annexin V $^+$ 7AAD $^{\text{neg}}$ ). We observed a  
135 significantly higher percentage of late apoptotic (annexin V $^+$ 7AAD $^+$ ) TCR $\gamma\delta^+$  and  
136 TCR $\beta^+$ CD4 $^+$ CD8 $\alpha^+$ , and a near significant higher percentage of TCR $\beta^+$ CD4 $^+$  IEL from

137 Spp-1<sup>-/-</sup> mice. Because the cell death and proliferation rates are inversely related, we  
138 investigated the proliferation frequencies in different IEL populations. TCRβCD4<sup>+</sup>,  
139 TCRβCD4<sup>+</sup>CD8α<sup>+</sup> and TCRβ<sup>+</sup>CD8αα<sup>+</sup> IEL derived from Spp-1<sup>-/-</sup> mice presented lower  
140 levels of dividing cells as indicated by the expression of Ki67 (Fig. 2b), corroborating the  
141 increase in apoptosis observed in IEL from osteopontin-deficient mice. However,  
142 despite the numbers of TCRγδ IEL were reduced in Spp-1<sup>-/-</sup> mice and presented an  
143 increased frequency of cells in late apoptosis, TCRγδ IEL from Spp-1<sup>-/-</sup> mice showed  
144 similar proliferation levels as cells derived from WT mice.

145 Overall, these results show that in the absence of osteopontin, IEL present  
146 higher apoptosis and reduced cell proliferation, which may account for the decreased  
147 IEL numbers observed in osteopontin-deficient mice.

148

149 *CD44 deficiency affects the IEL compartment.*

150 CD44 is one of the receptors for osteopontin<sup>36</sup> and is also expressed by IEL (Fig.  
151 3a). Therefore, we reasoned that if osteopontin provides a survival signal via CD44, the  
152 absence of this receptor should also result in decreased numbers of IEL. Most IEL  
153 populations from CD44<sup>-/-</sup> mice presented a trend of decreased numbers in both the  
154 small intestine and colon (Fig. 3b and 3c) in comparison to IEL from wild type mice. The  
155 difference was significant for total colon TCRβ<sup>+</sup> and subpopulations such as  
156 TCRβ<sup>+</sup>CD4<sup>+</sup>, and TCRβ<sup>+</sup>CD8αα<sup>+</sup> IEL. Interestingly, TCR<sup>neg</sup> cells also presented a  
157 reduction in numbers in the small intestine and colons of CD44<sup>-/-</sup> mice. These results  
158 show similarities between the IEL compartment observed in Spp-1<sup>-/-</sup> and CD44<sup>-/-</sup> mice,  
159 suggesting a role for the osteopontin-CD44 interaction for IEL survival.

160 As shown in Fig.1, the effect of osteopontin in steady-state levels seems to affect  
161 only the IEL compartment. To determine whether the frequencies of other CD44<sup>+</sup> cells  
162 in other immune compartments are affected by osteopontin, we analyzed TCRγδ<sup>+</sup>,  
163 TCRαβ<sup>+</sup>CD4<sup>+</sup> and TCRαβ<sup>+</sup>CD8<sup>+</sup> T cells from the spleen. The fraction of CD44<sup>+</sup> cells in  
164 these three populations was undistinguishable between WT and Spp-1<sup>-/-</sup> mice (Fig 3c),  
165 indicating that, at steady state levels, osteopontin does not affect the frequency of  
166 activated CD44<sup>+</sup> spleen T cells.

167

168 *Osteopontin promotes survival of IEL in a CD44-dependent manner.*

169 To further investigate the role of osteopontin in IEL survival, we used an *in vitro*  
170 system. For this purpose, first, we isolated total IEL (CD45<sup>+</sup> cells from IEL preparations)  
171 from WT mice and cultured them under different conditions. CD45<sup>+</sup> IEL cultured in  
172 media alone resulted in ~30% cell survival after 24 h of culture, followed by a constant  
173 decrease thereafter. However, addition of recombinant osteopontin resulted in improved  
174 IEL survival, to around 50% 24 h post culture (Fig. 4a). Recombinant osteopontin  
175 maintained increased IEL survival compared with media alone at 48 and 72 h post  
176 culture. However, when IEL were cultured in the presence of recombinant osteopontin  
177 and anti-osteopontin antibodies, cell survival was blunted to levels similar as observed  
178 for media alone, indicating that IEL *in vitro* survival was mediated by recombinant  
179 osteopontin (Fig. 4a). IEL incubated only with anti-osteopontin antibodies behaved  
180 similarly as cells cultured in media alone, suggesting that under these experimental  
181 conditions either IEL did not produce osteopontin or IEL-derived osteopontin was not a  
182 factor in cell survival. These results are in contrast to the work of Ito et al., that showed  
183 that IEL-derived osteopontin was important for their *in vitro* survival;<sup>35</sup> differences in  
184 culture systems between the two groups may account for this discrepancy. To  
185 determine whether the observed osteopontin-mediated IEL survival was facilitated by  
186 CD44, IEL were cultured in the presence of recombinant osteopontin and anti-CD44  
187 antibodies. As shown in Fig. 4a, CD44 blockage resulted in decreased IEL survival  
188 similar to that observed for media alone, especially at 48 and 72 h post-culture.  
189 Moreover, CD45<sup>+</sup> IEL derived from CD44-deficient mice cultured with recombinant  
190 osteopontin presented similar survival as IEL cultured in media alone (Fig. 4b),  
191 underscoring the importance of the interaction between osteopontin and CD44 in IEL  
192 survival. We then investigated the survival of different FACS-enriched IEL  
193 subpopulations from WT mice when cultured in the presence or absence of recombinant  
194 osteopontin. Increased survival was observed in TCR $\gamma\delta$ <sup>+</sup>, TCR $\beta$ <sup>+</sup>CD4<sup>+</sup>, TCR $\beta$ <sup>+</sup>CD8 $\alpha$ <sup>+</sup>  
195 and TCR $\beta$ <sup>+</sup>CD4<sup>+</sup>CD8 $\alpha$ <sup>+</sup> IEL when recombinant osteopontin was included in the media;  
196 however, the effect on survival was observed at different time points depending on the  
197 IEL population analyzed (Fig. 4c). Addition of anti-CD44 to the cultures blunted the  
198 osteopontin effect (Fig. 4c).

199 To determine whether osteopontin influences the survival of spleen T cells, we  
200 first incubated total splenocytes from WT mice in the presence or absence of  
201 recombinant osteopontin. As shown in Fig. 4d, survival of total spleen T cells was not  
202 affected by osteopontin. Moreover, FACS-enriched  $\text{TCR}\beta^+\text{CD44}^{\text{hi}}$  spleen cells from WT  
203 and  $\text{Spp-1}^{-/-}$  mice cultured in the presence or absence of osteopontin and/or anti-CD44  
204 presented no difference in their survival (Fig. 4e), indicating that osteopontin  
205 preferentially influences the *in vitro* survival of IEL via CD44 but not of total or  $\text{CD44}^+$   
206 spleen T cells.

207 The immune system of mice maintained in specific pathogen-free conditions  
208 more closely resembles that of human neonates rather than adults.<sup>37</sup> Therefore, to  
209 determine whether our findings with murine IEL are relevant to humans, we isolated  
210 total IEL from human neonates and cultured them in the presence or absence of  
211 recombinant osteopontin. Human IEL survived better in the presence of recombinant  
212 osteopontin than in its absence, and addition of anti-CD44 blunted the cytokine effect  
213 (Fig. 4f), in parallel to the results observed with mouse IEL. To determine the effect of  
214 osteopontin on other human lymphocytes, we employed PBMC from healthy adults, as  
215 we were unable to obtain PBMCs from the same neonate individuals for this purpose.  
216 As shown in Figure 4g, PBMC survival was not enhanced or reduced by any of the  
217 treatments used, which corroborates an intestinal IEL specific effect. Our results  
218 indicate that osteopontin promotes survival of murine and human IEL, and at least in the  
219 mouse system, this effect is mediated by CD44.

220

### 221 *Osteopontin induces a survival program in IEL*

222 The *in vivo* and *in vitro* studies presented in the previous sections indicate that  
223 osteopontin is an important cytokine involved in the survival of IEL. To investigate  
224 whether osteopontin, or its absence, alters the IEL transcription profile, we isolated RNA  
225 from FACS-enriched  $\text{TCR}\gamma\delta^+$ ,  $\text{TCR}\beta^+\text{CD4}^+$ ,  $\text{TCR}\beta^+\text{CD8}\alpha^+$  and  $\text{TCR}\beta^+\text{CD4}^+\text{CD8}\alpha^+$  IEL  
226 derived from naïve WT and  $\text{Spp-1}^{-/-}$  mice, and determined the expression of genes  
227 involved in preventing apoptosis. Comparison of genes expressed in IEL from WT and  
228  $\text{Spp-1}^{-/-}$  mice showed that  $\text{TCR}\gamma\delta^+$  cells from WT animals had more differentially  
229 expressed anti-apoptotic genes in comparison to the other IEL populations (Fig. 5a).



230 TCR $\beta$ <sup>+</sup>CD8 $\alpha$ <sup>+</sup> IEL presented little differential expression among the anti-apoptotic genes  
231 analyzed. On the other hand, TCR $\beta$ <sup>+</sup>CD4<sup>+</sup> and TCR $\beta$ <sup>+</sup>CD4<sup>+</sup>CD8 $\alpha$ <sup>+</sup> IEL differentially  
232 expressed some of these genes (Fig. 5a). Birc2, a known inhibitor of apoptosis in  
233 malignancies,<sup>38</sup> was one of the genes consistently differentially expressed in most IEL  
234 analyzed from WT mice, including TCR $\beta$ <sup>+</sup>CD4<sup>+</sup>CD8 $\alpha$ <sup>+</sup> cells (Fig. 5b). Other anti-  
235 apoptotic genes with higher expression in WT IEL were Prdx2, Polb, Dffa, Bric5 and  
236 Bcl10. Overall, these results indicate that osteopontin induces the expression of anti-  
237 apoptotic genes, but the gene profile varies between different IEL populations.

238 Because addition of recombinant osteopontin rescued wild type-derived CD45<sup>+</sup>  
239 IEL survival when cultured *in vitro* (Fig. 4a), we interrogated whether addition of this  
240 cytokine in cultured wild type IEL modifies their gene expression profile. For this  
241 purpose, we cultured FACS-enriched CD45<sup>+</sup> IEL from wild type mice in the presence or  
242 absence of osteopontin. Twenty-four hours post-culture, cells were collected, RNA  
243 extracted, sequenced and the gene expression profile determined. As recovery of  
244 sufficient cells for gene expression profile analysis after 24 h of culture from individual  
245 IEL populations was limiting, total CD45<sup>+</sup> IEL were used as an alternative approach.  
246 Gene set enrichment analysis (GSEA) revealed that IEL cultured in the presence of  
247 recombinant osteopontin express genes associated with retinoid X receptor (RXR)  
248 functions (Fig. 5c and 5d). This set included genes encoding products such as the  
249 vitamin D receptor (VDR), which dimerizes with RXR and modulates osteopontin gene  
250 transcription by binding to its promoter region,<sup>39</sup> and may induce a feedback loop in  
251 osteopontin-expressing IEL. GSEA also showed that IEL cultured in media alone  
252 present enriched pathways related to apoptosis, degradation of p27/p21 and  
253 downregulation of genes in Tregs (Fig. 5c and 5d). These sets included genes coding  
254 for proteasomal subunits, genes associated with cell cycle regulation (cyclin a2 and e1),  
255 and genes involved in programmed cell death pathways such as, caspases, Uba52, and  
256 Maged1. These results indicate that *in vitro* IEL exposure to osteopontin has an impact  
257 on the IEL gene transcription profile. However, it is important to consider that use of  
258 total CD45<sup>+</sup> IEL as the source for RNA increases variability in the results due to the  
259 different IEL populations present in the CD45<sup>+</sup> compartment.

260

261 *Osteopontin serves as checkpoint for development of intestinal inflammation*

262 We reasoned that if osteopontin deficiency affects the IEL compartment, and proper  
263 homeostasis of these cells is critical for protection against inflammation, then Spp-1<sup>-/-</sup>  
264 mice may be susceptible to spontaneous intestinal inflammation. For these purposes we  
265 monitored female Spp-1<sup>-/-</sup> mice from the time of weaning until 32 weeks of age. These  
266 mice gained weight during the observation period but not as much as wild type control  
267 females (Fig. 6a) and presented normal small intestine (Fig. 6b) and colon (not shown)  
268 architecture without signs of inflammation. However, spontaneous inflammation may  
269 become evident if another molecule involved in IEL homeostasis is disrupted. For this  
270 purpose, we crossed Spp-1<sup>-/-</sup> mice with thymus leukemia (TL) antigen deficient mice. TL  
271 is expressed in IEC and preferentially binds to CD8 $\alpha\alpha$  homodimers on IEL, controlling  
272 their effector functions and proliferation.<sup>40</sup> While TL-deficient animals do not develop  
273 spontaneous intestinal inflammation, when crossed to a susceptible strain, the offspring  
274 present an early onset and increased incidence of spontaneous intestinal  
275 inflammation.<sup>41</sup> Therefore, it is possible that disruption of two systems involved in IEL  
276 homeostasis, the TL-CD8 $\alpha\alpha$  and the osteopontin-CD44, may result in spontaneous  
277 intestinal inflammation. Spp-1<sup>-/-</sup>TL<sup>-/-</sup> mice also gained weight during all the observation  
278 period but at lower levels than WT and Spp-1<sup>-/-</sup> mice (Fig. 6a; for figure clarity, statistical  
279 significance at the relevant time points is presented in the figure legend). Interestingly,  
280 analysis of ileum pathology showed an increase in IEL and lamina propria inflammatory  
281 foci in Spp-1<sup>-/-</sup>TL<sup>-/-</sup> in comparison to WT and Spp-1<sup>-/-</sup> mice (Fig. 6b and 6c). These  
282 results indicate that in the proper context, the absence of osteopontin may lead to  
283 spontaneous intestinal inflammation, underscoring its importance as an intestinal  
284 checkpoint.

285

286 *Osteopontin prevents intestinal inflammation but not migration into the epithelium.*

287 We have provided evidence indicating that the IEL deficiency observed in Spp-1<sup>-/-</sup>  
288 mice is due to IEL survival; however, it is possible that osteopontin also affects  
289 migration of T cells into the epithelium. To test this hypothesis, we adoptively  
290 transferred total spleen T cells from WT mice into Rag-2<sup>-/-</sup> or Spp-1<sup>-/-</sup>Rag-2<sup>-/-</sup> recipient  
291 mice, and after 7 days we determined the number of cells migrating into the intestinal

292 epithelium. Both  $\text{TCR}\beta^+\text{CD4}^+$  and  $\text{TCR}\beta^+\text{CD8}\alpha^+$  cells migrated similarly into the  
293 epithelium of  $\text{Rag-2}^{-/-}$  or  $\text{Spp-1}^{-/-}\text{Rag-2}^{-/-}$  recipient mice (Fig. 7a), indicating that  
294 osteopontin does not influence the migration of these cells into the intestinal mucosa.  
295 We did not analyze spleen-derived  $\text{TCR}\gamma\delta$  cells because their numbers in the inoculum  
296 were very low and these cells do not reconstitute the mucosa properly. Interestingly,  
297 reconstitution analysis at 28 days post transfer showed a reduction in the total number  
298 of  $\text{TCR}\beta^+\text{CD4}^+$  and  $\text{TCR}\beta^+\text{CD4}^+\text{CD8}\alpha^+$  cells (Fig. 7b), which resembled what was  
299 observed in  $\text{Spp-1}$ -deficient mice (Fig. 1a). On the other hand, the numbers of adoptive  
300 transferred  $\text{TCR}\beta^+\text{CD8}\alpha^+$  cells recovered were similar between  $\text{Rag-2}^{-/-}$  or  $\text{Spp-1}^{-/-}\text{Rag-}$   
301  $2^{-/-}$  recipient mice at 28 days post transfer (Fig. 7b). To prevent the development of  
302 intestinal inflammation in  $\text{Rag-2}^{-/-}$  recipient mice, we transferred total T cells, which  
303 includes regulatory T cells. To our surprise,  $\text{Spp-1}^{-/-}\text{Rag-2}^{-/-}$  recipient mice lost more  
304 weight than  $\text{Rag-2}^{-/-}$  mice (Fig. 7c) and presented increased colon inflammation (Fig.  
305 7d), suggesting that the absence of osteopontin in the host promoted disease  
306 development. To test whether CD44, as a receptor for osteopontin, was also involved in  
307 disease development in this system, we adoptively transferred total T cells from  $\text{CD44}^{-/-}$   
308 donor mice into  $\text{Rag-2}^{-/-}$  and  $\text{Spp-1}^{-/-}\text{Rag-2}^{-/-}$  recipient mice.  $\text{Rag-2}^{-/-}$  mice that received  
309 total spleen T cells from WT mice did not lose weight, whereas  $\text{Rag-2}^{-/-}$  and  $\text{Spp-1}^{-/-}\text{Rag-}$   
310  $2^{-/-}$  recipient mice that received spleen cells from  $\text{CD44}^{-/-}$  donor mice lost weight  
311 comparably starting at 2 weeks post transfer (Fig. 7e), with clear signs of intestinal  
312 inflammation (Fig. 7f).

313 Overall, this evidence indicates that adoptive transfer of total T cells into  $\text{Spp-1}^{-/-}$   
314  $\text{Rag-2}^{-/-}$  mice result in similar  $\text{TCR}\beta^+\text{CD4}^+$  and  $\text{TCR}\beta^+\text{CD8}\alpha^+$  T cell migration into the IEL  
315 compartment at 7 days after transference; however, the total number of  $\text{TCR}\beta^+\text{CD4}^+$   
316 and  $\text{TCR}\beta^+\text{CD4}^+\text{CD8}\alpha^+$  T were significantly reduced in an osteopontin-deficient  
317 environment. Unexpectedly, decreased IEL reconstitution was accompanied by  
318 intestinal inflammation. These results suggest that host-derived osteopontin and  
319 expression of CD44 on the transferred T cells, are important for preventing development  
320 of intestinal inflammation even in the presence of regulatory T cells.

321

322 *Osteopontin sustains Foxp3 expression in Tregs*

323 We expected that transferring total T cells into Spp-1<sup>-/-</sup>Rag-2<sup>-/-</sup> mice would result in  
324 protection against intestinal inflammation similar to that observed for Rag-2<sup>-/-</sup> recipient  
325 mice, due to the presence of regulatory T cells in the inoculum. However, because  
326 disease was observed in Spp-1<sup>-/-</sup>Rag-2<sup>-/-</sup> recipient mice, we investigated the fate of  
327 regulatory T cells in the presence or absence of osteopontin. Regulatory T cells are  
328 known to express CD44, which when ligated, promotes sustained Foxp3 expression.<sup>42</sup>  
329 Thus, we hypothesized that binding of osteopontin to CD44 is a potential signal that  
330 maintains proper Foxp3 expression. To test this possibility, we cultured CD4 T cells  
331 derived from the intestinal mucosa from RFP-Foxp3 mice in the presence or absence of  
332 recombinant osteopontin, with or without anti-CD44. After 72 h of culture, there was an  
333 increase in the percentage of RFP<sup>+</sup> cells in the presence of osteopontin, which was  
334 blunted with the addition of anti-CD44 antibodies (Fig. 8a). Figure 8b shows the  
335 combined fold increase over the untreated cells.

336 To test whether osteopontin sustains Foxp3 expression *in vivo*, we sorted splenic  
337 RFP<sup>+</sup> cells from RFP-Foxp3 reporter mice and adoptively transferred them into Rag-2<sup>-/-</sup>  
338 or Spp-1<sup>-/-</sup>Rag-2<sup>-/-</sup> recipient mice. Eight weeks after transfer, IEL were isolated and the  
339 percentage of donor-derived (CD45<sup>+</sup>TCRβ<sup>+</sup>CD4<sup>+</sup>) RFP<sup>+</sup> cells was determined (Fig. 8c,  
340 dot plots). Rag-2<sup>-/-</sup> mice presented a trend of higher percentage of donor-derived cells in  
341 the IEL compartment than Spp-1<sup>-/-</sup>Rag-2<sup>-/-</sup> recipient mice (Fig 8d). Approximately 10% of  
342 the donor-derived cells from Rag-2<sup>-/-</sup> recipient mice remained RFP<sup>+</sup>, whereas only 4% of  
343 cells recovered from Spp-1<sup>-/-</sup>Rag-2<sup>-/-</sup> recipient mice remained RFP<sup>+</sup> (Fig. 8e). These  
344 results indicate that osteopontin sustains Foxp3 expression in regulatory T cells in the  
345 IEL compartment, possible mediated by CD44 ligation, with significant impact in the  
346 development of intestinal inflammation.

347

## 348 Discussion

349 Intestinal IEL reside in the unique environment of the IEC monolayer. In this anatomical  
350 location, IEL are poised as the first immunological layer of defense against potential  
351 pathogens from the intestinal lumen. In order for IEL to fulfill their immunological roles,  
352 they need to remain in their niche and survive. However, because IEL represent a  
353 diverse population of lymphoid cells, requirements for their homeostasis within the

354 epithelium may depend on the particular type of IEL. For example, TCR $\gamma\delta^+$  IEL require  
355 IL-7 for their proper development whereas other IEL are not affected by this cytokine.<sup>43</sup>  
356 On the other hand, IL-15 deficiency does not disturb TCR $\gamma\delta^+$  IEL but has a significant  
357 impact on TCR $\alpha\beta^+$ CD8 $\alpha\alpha^+$ , iCD8 $\alpha$  and iCD3 $^+$  IEL.<sup>7, 8, 44</sup> The results presented in this  
358 report indicate that osteopontin provides survival signals to a great fraction of IEL,  
359 including TCR $\alpha\beta$ , TCR $\gamma\delta$  and TCR<sup>neg</sup> cells. This implies that despite having different  
360 developmental pathways and cytokine requirements, the presence of osteopontin in the  
361 epithelium ensures the survival of most types of intestinal IEL.

362 Osteopontin-mediated T cell survival has been documented previously. For  
363 example, concanavalin A-activated T cells from lymph nodes show reduced levels of  
364 cell death in the presence of osteopontin.<sup>24</sup> Moreover, Hur et al. also demonstrated that  
365 osteopontin alters the expression of pro-apoptotic molecules such as Bim, Bak and Bax,  
366 promoting T cell survival.<sup>24</sup> Using an *in vitro* system, we showed that TCR $^+$  IEL rapidly  
367 die in the absence of osteopontin, whereas IEL cultured in the presence of osteopontin  
368 presented increased *in vitro* survival (Fig. 4). It is important to notice the differential  
369 behavior of cultured IEL subpopulations, e.g., the survival of TCR $\gamma\delta^+$  and  
370 TCR $\beta^+$ CD4 $^+$ CD8 $\alpha^+$  IEL is less than 50% after 24 h post culture decreasing to around  
371 10% by 72 h, and it is at this point that the effect of osteopontin is more evident for  
372 these cells. On the other hand, TCR $\beta^+$ CD4 $^+$  and TCR $\beta^+$ CD8 $\alpha^+$  IEL have a better  
373 survival after 24 h (more than 50%), whereas the osteopontin effect is evident for the  
374 former cells starting at 48 h. These results indicate that each IEL subpopulation possess  
375 different survival kinetics, but appear to have a similar requirement for osteopontin for  
376 their survival.

377 Because IEL are considered to be in a “semi-activated” state,<sup>45</sup> osteopontin  
378 appears to primarily affect activated T cells, which express CD44. Interestingly, splenic  
379 CD44 $^+$  T cell numbers are similar in wild type and Spp-1 $^{-/-}$  mice (Fig. 3c), suggesting  
380 that osteopontin does not affect the overall effector T cell population. Moreover, *in vitro*  
381 survival of CD44 $^+$  spleen T cells is not affected by addition of osteopontin (Fig. 4e). It is  
382 important to note that previous reports have demonstrated a pivotal role for osteopontin  
383 as an enhancer for the survival of effector Th17 cells, particularly during brain

384 inflammation;<sup>24</sup> however, whereas this group studied differentiated Th17 cells in the  
385 context of brain inflammation our results are based on CD44<sup>+</sup> T cells in naïve animals.

386 In the adoptive transfer experiments reported here, donor CD4 T cells from wild  
387 type mice reconstituted the IEL compartment of Spp-1<sup>-/-</sup>Rag-2<sup>-/-</sup> recipient mice less  
388 efficiently than in Rag-2<sup>-/-</sup> recipient mice (Fig. 7), suggesting that an environment  
389 capable of producing osteopontin is important for proper cell survival. However, transfer  
390 of T cells from osteopontin-deficient donor mice into Rag-2<sup>-/-</sup> recipient mice resulted in  
391 reduced survival rates in the spleen and lymph nodes in comparison to donor T cells  
392 from wild type donor mice.<sup>25</sup> These results indicate that intrinsic T cell-derived  
393 osteopontin is critical for normal cell reconstitution in secondary lymphoid organs  
394 whereas T cells present in the IEL compartment present an increase dependency for  
395 their survival on osteopontin derived from the environment.

396 Adoptive transfer of total spleen T cells into immunodeficient hosts, such as Rag-  
397 2<sup>-/-</sup> mice, results in cellular reconstitution and protection from T cell-mediated colitis due  
398 to the presence of regulatory T cells.<sup>46, 47</sup> Surprisingly, when recipient Rag-2<sup>-/-</sup> mice were  
399 deficient in osteopontin (Rag-2<sup>-/-</sup>Spp-1<sup>-/-</sup> animals), mice developed colitis even in the  
400 presence of regulatory T cells, indicating that environmental osteopontin is important for  
401 maintaining regulatory T cell function (Fig. 7). This was evident when transfer of  
402 regulatory T cells (RFP-Foxp3<sup>+</sup> cells) into Spp-1<sup>-/-</sup>Rag-2<sup>-/-</sup> hosts resulted in lower  
403 recovery of RFP<sup>+</sup> cells from the intestinal epithelium in comparison to cells transferred  
404 into Rag-2<sup>-/-</sup> hosts (Fig. 8c and d). Therefore, similar to other IEL, regulatory T cells  
405 appear to be responsive to osteopontin via CD44, but in this case osteopontin helps to  
406 sustain the levels of Foxp3 expression. Of note, activation of naïve T cells  
407 (CD4<sup>+</sup>CD45RB<sup>hi</sup>) or their subsequent pathogenic capacity when adoptively transferred  
408 into Rag-2<sup>-/-</sup> mice requires T cell-derived osteopontin.<sup>48</sup>

409 If a significant fraction of IEL require osteopontin for their survival, what are the  
410 cellular sources for this cytokine in the intestines? Under steady-state conditions IEC do  
411 not express osteopontin, but some IEL populations do. Osteopontin expression appears  
412 to be confined to TCR $\gamma\delta$  and TCR $\alpha\beta$ <sup>+</sup>CD8 $\alpha$ <sup>+</sup> IEL.<sup>35</sup> On a per cell basis, iCD8 $\alpha$  cells  
413 present high levels of osteopontin mRNA expression.<sup>8</sup> Therefore, IEL survival may

414 depend on IEL-derived osteopontin, suggesting possible interactions between different  
415 IEL populations.

416 In the past few years, the role of osteopontin in the etiology of human diseases  
417 has been greatly appreciated. For example, recent work has investigated the use of  
418 neutralizing anti-osteopontin antibodies as a therapeutic with preclinical studies  
419 currently underway (ref. in <sup>49</sup>). Studies such as the one described herein show that  
420 osteopontin neutralization may carry unwanted side-effects, especially if patients are  
421 immunocompromised. Osteopontin appears to be a critical molecule with multiple  
422 effects, one of them supporting proper IEL homeostasis, and therefore additional  
423 studies are needed to better understand its function and how it affects the biology of the  
424 mucosal immune system.

425

## 426 **Figure legends**

427 **Fig. 1.** Spp-1<sup>-/-</sup> mice have a deficient IEL compartment. **a** Representative frequency (dot  
428 plots) and total cell numbers (graphs) of different IEL populations from the small  
429 intestine of wild type (WT) and Spp-1<sup>-/-</sup> mice. After excluding dead cells (not shown) and  
430 IEC, cells were gated as CD45<sup>+</sup> cells (not shown). Each dot represents an individual  
431 mouse ( $n = 12$ ). **b** Total IEL numbers from colon of WT and Spp-1<sup>-/-</sup> mice, gated as in  
432 **a**. Each dot represents an individual mouse ( $n = 13$ ). **c** Total cell numbers of the  
433 indicated populations in spleen from WT and Spp-1<sup>-/-</sup> mice ( $n=8$ ). Bars indicate SEM. **d**  
434 Total cell numbers of different lymphoid populations in the lamina propria. Each dot  
435 represents an individual mouse ( $n=5$ ). Data from **a** to **d** are representative of two to  
436 three independent experiments. \*  $P<0.05$ ; \*\* $P<0.01$ ; \*\*\* $P<0.001$ ; \*\*\*\* $P<0.0001$  (Mann-  
437 Whitney U test).

438

439 **Fig. 2.** IEL from osteopontin-deficient mice present higher apoptosis and less cell  
440 division. **a** Annexin V staining of different IEL populations derived from WT and Spp-1<sup>-/-</sup>  
441 mice. Cells were gated as CD45<sup>+</sup> cells. Dot plots show a representative sample.  
442 Summary is indicated in the graphs. Early apoptosis (annexin V<sup>+</sup>7AAD<sup>neg</sup>), late  
443 apoptosis (annexin V<sup>+</sup>7AAD<sup>+</sup>), necrosis (annexin V<sup>neg</sup>7AAD<sup>+</sup>). Data are representative of  
444 three independent experiments. Each dot represents an individual sample ( $n = 8$  to 10).

445 **b** Ki67 intracellular staining of different IEL populations derived from WT and Spp-1<sup>-/-</sup>  
446 mice. After excluding dead cells and IEC, cells were gated as CD45<sup>+</sup> cells. Data are  
447 representative from two independent experiments. Each dot represents an individual  
448 sample ( $n = 9$  to  $10$ ). \* $P < 0.05$ ; \*\* $P < 0.01$  (Mann-Whitney U test).

449

450 **Fig. 3.** CD44<sup>-/-</sup> mice have a reduced IEL compartment. **a** CD44 expression in TCR $\gamma\delta$ <sup>+</sup>  
451 and TCR $\beta$ <sup>+</sup> IEL from WT mice. After excluding dead cells and IEC, cells were gated as  
452 CD45<sup>+</sup> cells. **b** Total numbers of different IEL populations derived from the small  
453 intestine or colon from WT and CD44<sup>-/-</sup> mice. Data is combined of three independent  
454 experiments ( $n = 12$  to  $19$ ). **c** CD44 expression in the indicated spleen T cells from WT  
455 and Spp-1<sup>-/-</sup> mice. After excluding dead cells, cells were gated as CD45<sup>+</sup> cells. Dot plots  
456 show a representative sample. Results are summarized in graphs. Data are  
457 representative from two independent experiments. Each dot represents an individual  
458 sample ( $n = 9$  to  $10$ ). \* $P < 0.05$  (Mann-Whitney U test).

459

460 **Fig. 4.** Osteopontin promotes IEL survival. **a** Enriched total CD45<sup>+</sup> IEL from WT mice  
461 were incubated in the presence or absence of anti-mouse osteopontin (2  $\mu\text{g/ml}$ ),  
462 recombinant murine osteopontin (2  $\mu\text{g/ml}$ ), and anti-mouse CD44 (5  $\mu\text{g/ml}$ ). After the  
463 indicated time points, cell survival was determined. Data are representative of three  
464 independent experiments. Biological replicates consisted of two to three independent  
465 pooled IEL preparations from individual mice; each experiment consisted of 3 biological  
466 replicas. **b** Enriched total CD45<sup>+</sup> IEL from CD44<sup>-/-</sup> mice were treated as in **a**. Data are  
467 representative of three independent experiments. Biological replicas consisted of two to  
468 three independent pooled IEL preparations from individual mice; each experiment  
469 consisted of 3 biological replicas. **c** Indicated FACS-enriched IEL populations from WT  
470 mice were left untreated or treated with recombinant osteopontin with or without anti-  
471 CD44. After the indicated time points, cell survival was determined. Data are  
472 representative of three independent experiments. Biological replicas consisted of two to  
473 three independent pooled IEL preparations from individual mice; each experiment  
474 consisted of 3 biological replicas. **d** Enriched CD45<sup>+</sup> splenocytes were incubated in the  
475 presence or absence of recombinant osteopontin (2  $\mu\text{g/ml}$ ). After the indicated time



476 points, cell survival was determined. Data are representative of two independent  
477 experiments ( $n = 3$ ). **e** FACS-enriched  $\text{TCR}\beta^+\text{CD44}^+$  spleen cells from WT and  $\text{Spp-1}^{-/-}$   
478 mice were treated as in **c**. After the indicated time points, cell survival was determined.  
479 Data are representative of two independent experiments ( $n = 3$ ). **f** Neonatal human IEL  
480 were incubated in the presence or absence of recombinant human osteopontin (2  
481  $\mu\text{g/ml}$ ) and anti-human CD44 (5 $\mu\text{g/ml}$ ). After the indicated time points, cell survival was  
482 determined. Each symbol represents an individual human: circle, small intestine from 1-  
483 day old patient presenting volvulus and necrosis; square, ileum and colon from 17-day  
484 old patient presenting necrotizing enterocolitis; triangle, jejunum from 12-day old patient  
485 presenting necrotizing enterocolitis; diamond and hexagon, de-identified individuals. **g**  
486 PBMC from adult humans were incubated in the presence or absence of recombinant  
487 human osteopontin with or without anti-human CD44 (5  $\mu\text{g/ml}$ ). After the indicated time  
488 points, cell survival was determined. Data are representative of two independent  
489 experiments ( $n = 3$ ). \* $P < 0.05$ ; \*\* $P < 0.01$ ; \*\*\* $P < 0.001$ ; \*\*\*\* $P < 0.0001$  (One-way ANOVA).  
490 aOPN = anti-osteopontin antibody; rOPN = recombinant osteopontin; aCD44 = anti-  
491 CD44 antibody.

492

493 **Fig. 5.** Osteopontin induces a survival program in IEL. **a** RNA was isolated from FACS-  
494 enriched  $\text{TCR}\gamma\delta^+$ ,  $\text{TCR}\beta^+\text{CD4}^+$ ,  $\text{TCR}\beta\text{CD8}\alpha^+$  and  $\text{TCR}\beta^+\text{CD4}^+\text{CD8}\alpha^+$  IEL from WT and  
495  $\text{Spp-1}^{-/-}$  mice, and used to detect expression of anti-apoptosis-related genes using a  
496 QIAGEN RT<sup>2</sup> Profiler PCR Array. Each column represents the average of 4 samples  
497 from individual mice. Heat-map is a representative experiment of two performed. **b**  
498 Heat-map representing a sample of genes differentially expressed in most WT IEL  
499 populations. Data were derived from **(b)**. **c** Enriched  $\text{CD45}^+$  IEL derived from 2  
500 individual WT mice were pooled into one biological replicate. A total of 8 mice were  
501 used yielding 4 replicates. Half the cells from each replicate were incubated in the  
502 presence or absence of osteopontin (2  $\mu\text{g/ml}$ ) for 24 h. RNA-Seq was used to detect  
503 gene expression profile. Each column depicts a representative biological replicate. **c**  
504 Gene set enrichment analysis summary.

505

506 **Fig. 6.** Combined osteopontin and TL deficiency results in spontaneous ileal  
507 inflammation. **a** Weights of WT, Spp-1<sup>-/-</sup> and Spp-1<sup>-/-</sup>TL<sup>-/-</sup> female mice were monitored for  
508 seven months starting at weaning age ( $n = 3$  to 5). Statistical difference for: WT vs Spp-  
509 1<sup>-/-</sup> mice was  $P < 0.05$  or  $P < 0.01$  between week 6 to 24; WT vs Spp-1<sup>-/-</sup>TL<sup>-/-</sup> mice was  
510  $P < 0.005$  or  $P < 0.001$  between week 6 to 32; and Spp-1<sup>-/-</sup> vs Spp-1<sup>-/-</sup>TL<sup>-/-</sup> mice was  
511  $P < 0.01$  only at week 30 (two-way ANOVA). **b** Representative H&E sample of ileum at  
512 the end time point (200X magnification). Ovals indicate foci of IEL and lamina propria  
513 inflammation. Arrows indicate lymphocyte infiltration. **c** Summary of pathology score.  
514 Each symbol represents an individual sample.

515  
516 **Fig. 7.** Environmental osteopontin influences IEL reconstitution and prevents intestinal  
517 inflammation. **a** Enriched total spleen T cells from WT mice were adoptively transferred  
518 into the indicated recipients mice, and 7 days after transfer, donor-derived cells were  
519 analyzed. After excluding dead cells, donor cells were gated as TCR $\beta^+$ CD45<sup>+</sup> IEL. Dot  
520 plots show a representative sample. Results are summarized in graphs.  
521 TCR $\beta^+$ CD4<sup>+</sup>CD8 $\alpha^+$  cells were not detected above background at this time point in either  
522 group. Data are representative from two independent experiments. Each dot represents  
523 an individual sample ( $n = 4$  to 5). **b** The same analysis as in (a) performed at 28 days  
524 post transfer. After excluding dead cells, donor cells were gated as TCR $\beta^+$ CD45<sup>+</sup> IEL  
525 (not shown). Dot plots show one representative sample. Results are summarized in  
526 graphs. Data are representative from three independent experiments. Each dot  
527 represents an individual animal ( $n = 9$ ). **c** Total weight change at 28 days post transfer  
528 of mice treated as in b. Data are representative from three independent experiments.  
529 Each dot represents an individual sample ( $n = 9$ ). **d** Representative H&E stained  
530 samples of colon sections from the indicated mice analyzed at 28 days of (200X  
531 magnification). Graph indicates total histological score [immune cell infiltration (3  
532 points), loss of goblet cells (3 points), crypt damage (3 points) and epithelial hyperplasia  
533 (3 points)]. Data are representative from three independent experiments. Each dot  
534 represents an individual sample ( $n = 9$ ). **e** Enriched total T cells from CD44<sup>-/-</sup> mice were  
535 adoptively transferred into the indicated recipient mice and weights were monitored  
536 weekly. **f** Colon pathology scored as in (d). Data are representative from two

537 independent experiments. Each dot represents an individual sample ( $n = 6$  to  $7$ ).  
538 \*\* $P < 0.01$  (Mann-Whitney U test).

539

540 **Fig. 8.** Osteopontin sustains Foxp3 expression. **a** Intestinal T cells from RFP-Foxp3  
541 reporter mice were isolated and cultured in the presence or absence of recombinant  
542 osteopontin ( $2 \mu\text{g/ml}$ ) and anti-CD44 ( $5 \mu\text{g/ml}$ ). Seventy-two hours later, the percentage  
543 of RFP<sup>+</sup> cells was determined by flow cytometry. After excluding dead cells, dot plots  
544 were gated as CD45<sup>+</sup>TCR $\beta$ <sup>+</sup> cells. **b** Bar graph indicates the fold change in CD4<sup>+</sup>RFP<sup>+</sup>  
545 cells in relation to the null group. Data are representative of three independent  
546 experiments. **c** Enriched splenic RFP<sup>+</sup> cells from RFP-Foxp3 reporter mice were  
547 adoptively transferred into Rag-2<sup>-/-</sup> and Spp-1<sup>-/-</sup>Rag-2<sup>-/-</sup> recipient mice. Eight weeks after  
548 transfer, IEL from small intestine were isolated and the percentage of RFP<sup>+</sup> determined.  
549 After excluding dead cells, dot plots were gated as indicated by the arrows. **d** Summary  
550 of the percentage of donor-derived cells recovered; each dot represents an individual  
551 mouse. Data are representative from three independent experiments. **e** Summary of the  
552 percentage of RFP<sup>+</sup> cells within the donor-derived cells. \* $P < 0.05$  (Mann-Whitney T  
553 test). rOPN = recombinant osteopontin; aCD44 = anti-CD44 antibodies.

554

## 555 **Materials and Methods**

556 *Mice.* CD44<sup>-/-</sup>, Rag-2<sup>-/-</sup>, Spp-1<sup>-/-</sup> and RFP-Foxp3 reporter mice on the C57BL/6  
557 background were obtained from the Jackson Laboratories. TL<sup>-/-</sup> mice were developed in  
558 our laboratory as previously described.<sup>41</sup> To homogenize the microbiome of vendor-  
559 derived mice, we co-housed or bred mice with established WT C57BL/6 mice from our  
560 colony. Spp-1<sup>-/-</sup>Rag-2<sup>-/-</sup> mice were generated in our colony by breeding Spp-1<sup>+/-</sup> with  
561 Rag-2<sup>+/-</sup> mice. Spp-1<sup>-/-</sup>TL<sup>-/-</sup> mice were generated in our colony by breeding Spp-1<sup>+/-</sup> with  
562 TL<sup>+/-</sup> mice. Mice were maintained in accordance with the Institutional Animal Care and  
563 Use Committee at Vanderbilt University.

564

565 *IEL isolation.* IEL were isolated by mechanical disruption as previously reported.<sup>41</sup>  
566 Briefly, after flushing the intestinal contents with cold HBSS and removing excess  
567 mucus, the intestines were cut into small pieces (~1cm long) and shaken for 45 minutes

568 at 37°C in HBSS supplemented with 5% fetal bovine serum and 2 mM EDTA.  
569 Supernatants were recovered and cells isolated using a discontinuous 40/70% Percoll  
570 (General Electric) gradient. To obtain lamina propria lymphocytes, intestinal tissue was  
571 recovered and digested with collagenase (187.5 U/ml, Sigma) and DNase I (0.6 U /ml,  
572 Sigma). Cells were isolated using a discontinuous 40/70% Percoll gradient.

573

574 *Human samples.* The Vanderbilt University Medical Center Institutional Review Board  
575 approved sample collection (IRB# 090161 and 190182). All samples were de-identified  
576 and written informed consent was obtained. Peripheral blood mononuclear cells were  
577 isolated by ficoll gradient from unidentified healthy adult volunteers as previously  
578 described.<sup>50</sup> A pathologist from the Vanderbilt Children's Hospital provided fresh  
579 intestinal tissue specimens from infants. Isolation of human cells associated with the  
580 intestinal epithelium was performed as previously described.<sup>51</sup> Briefly, tissue was cut in  
581 small ~1 cm pieces and incubated with slow shaking for 30 minutes at room  
582 temperature in HBSS (without calcium and magnesium) supplemented with 5% fetal  
583 bovine serum, 5mM EDTA and an 1% antibiotic mix (pen-strep-AmphoB; Fisher-Lonza).  
584 After incubation, cells in the supernatant were recovered.

585

586 *Reagents and flow cytometry.* Fluorochrome-coupled anti-mouse CD4, -CD44, -CD45, -  
587 CD8 $\alpha$ , -TCR $\beta$ , -TCR $\gamma\delta$ , Ki69 and isotype controls were purchased from ThermoFisher or  
588 BD Biosciences. Annexin V and 7AAD were purchased from BD biosciences. All  
589 staining samples were acquired using a FACS Canto II or 4-Laser Fortessa Flow  
590 System (BD Biosciences) and data analyzed using FlowJo software (Tree Star). Cell  
591 staining was performed following conventional techniques. Manufacturer's instructions  
592 were followed for Annexin V staining. FACS sorting was performed using a FACSAria III  
593 at the Flow Cytometry Shared Resource at VUMC.

594

595 *In vitro survival assay.* Total IEL enriched for CD45<sup>+</sup> cells using magnetic beads  
596 (Miltenyi) or FACS-enriched subpopulations were incubated in a 96-well flat-bottom well  
597 plate (Falcon, Fisher Scientific) at a density of 5x10<sup>5</sup> cells/ml in RPMI containing 10%  
598 fetal bovine serum. In some groups culture media was supplemented with anti-

599 osteopontin (2  $\mu\text{g/ml}$ ) (R&D), recombinant osteopontin (2  $\mu\text{g/ml}$ ) (R&D), or anti-CD44 (5  
600  $\mu\text{g/ml}$ )(Thermofisher). Cells were cultured in 5%  $\text{CO}_2$  at 37°C. At time 0 and every 24 h,  
601 an aliquot from the culture was taken to count live cells. Percentage of live cells was  
602 calculated in reference to time 0. For human samples, total PBMC or IEL were cultured  
603 in the presence or absence of recombinant human osteopontin (2  $\mu\text{g/ml}$ ) (R&D) and  
604 anti-human-CD44 (5  $\mu\text{g/ml}$ ) (Thermofisher).

605

606 *Transcription profile analysis.* For gene expression array, RNA was isolated from FACS-  
607 enriched IEL subpopulations from 4 individual WT and Spp-1<sup>-/-</sup> mice. Samples were  
608 prepared for RT<sup>2</sup> Profiler PCR Array (QIAGEN PAMM-012Z) and analyzed following  
609 manufacturer's instructions. For RNAseq analysis, RNA was isolated from FACS-  
610 enriched CD45<sup>+</sup> IEL derived from WT mice cultured for 24 h in the presence or absence  
611 of recombinant osteopontin using the QIAGEN RNeasy micro kit. Sequencing was  
612 performed on an Illumina NovaSeq 6000 (2 x 150 base pair, paired-end reads). The tool  
613 Salmon<sup>52</sup> was used for quantifying the expression of RNA transcripts. The R project  
614 software along with the edgeR method<sup>53</sup> was used for differential expression analysis.  
615 For gene set enrichment analysis (GSEA), RNAseq data was ranked according to the t-  
616 test statistic. The gene sets curated (C2), GO (C5), immunological signature collection  
617 (C7) and hallmarks of cancer (H) of the Molecular Signatures Database (MSigDB) were  
618 used for enrichment analysis. GSEA enrichment plots were generated using the GSEA  
619 software<sup>54</sup> from the Broad Institute with 1000 permutations.

620

621 *Adoptive transfer of total T cells.* Total splenocytes from WT mice were depleted of  
622 CD19-positive cells using magnetic beads (Miltenyi). Four to 6 million cells were  
623 adoptively transferred (i.p.) into Rag-2<sup>-/-</sup> or Spp-1<sup>-/-</sup>Rag-2<sup>-/-</sup> mice. Starting weight was  
624 determined prior to injection. Seven or 28 days later, recipient mice were weighed,  
625 sacrificed and donor cells from the intestines analyzed by flow cytometry. In some  
626 experiments a segment of the colon was excised and prepared for histological  
627 examination. In some experiments CD19-depleted splenocytes from CD44<sup>-/-</sup> mice were  
628 adoptively transferred into Rag-2<sup>-/-</sup> or Spp-1<sup>-/-</sup>Rag-2<sup>-/-</sup> mice. Mice were weighed weekly  
629 for 4 weeks, and cells and colon analyzed as indicated above.

630

631 *In vitro and in vivo Foxp3 expression.* Lamina propria lymphocytes isolated from RFP-  
632 Foxp3 mice were cultured in the presence or absence of recombinant osteopontin and  
633 anti-CD44 antibodies as described above. At time 0 and 72 h later, cells were analyzed  
634 by flow cytometry to detect RFP expression in live TCR<sup>+</sup>CD4<sup>+</sup> cells. For *in vivo*  
635 experiments, CD4<sup>+</sup>RFP<sup>+</sup> splenocytes were enriched by FACS and 2 x10<sup>5</sup> cells were  
636 adoptively transferred i.p. into Rag-2<sup>-/-</sup> or Spp-1<sup>-/-</sup>Rag-2<sup>-/-</sup> mice. Eight weeks later, IEL  
637 were isolated and RFP expression analyzed in CD45<sup>+</sup>TCRβ<sup>+</sup>CD4<sup>+</sup> donor-derived cells.

638

639 *Statistical analysis.* Statistical significance between 2 groups was determined using  
640 Mann-Whitney U-test. For analysis of 3 groups or more, one-way nonparametric  
641 (Kruskal-Wallis) test or two-way ANOVA followed by Dunn's multiple comparison tests  
642 were used appropriately. All data was analyzed in GraphPad Prism 7 and showed as  
643 mean ± standard error mean (SEM). A *P* value <0.05 was considered significant.

644

#### 645 **Acknowledgments**

646 We thank the Flow Cytometry Shared Resource for technical help and guidance; the  
647 Translational Pathology Shared Resource for tissue processing. We thank Dr. Luc Van  
648 Kaer for revising the manuscript. This work was supported by NIH grant R01DK111671  
649 (to D.O-V.); Careers in Immunology Fellowship Program from the American Association  
650 of Immunologist (to D.O-V. and A.N.); National Library of Medicine T15 LM00745 grant  
651 (to M.J.G.); and scholarships from the Digestive Disease Research Center at Vanderbilt  
652 University Medical Center supported by NIH grant P30DK058404.

653

#### 654 **Author Contributions**

655 A.N., designed and performed experiments, analyzed data and wrote the manuscript;  
656 M.J.G., designed and performed experiments, analyzed data and wrote the manuscript;  
657 K.L.H., performed experiments; M.B.P., provided expert pathological analysis of colon  
658 and small intestine tissue; J-H.W., provided procurement of human samples; D.O-V.,  
659 designed and performed experiments, analyzed data, wrote the manuscript and  
660 procured funding.

661

662 **References**

- 663 1. Cheroutre, H., Lambolez, F. & Mucida, D. The light and dark sides of intestinal  
664 intraepithelial lymphocytes. *Nat Rev Immunol* **11**, 445-456 (2011).  
665
- 666 2. Olivares-Villagomez, D. & Van Kaer, L. Intestinal Intraepithelial Lymphocytes:  
667 Sentinels of the Mucosal Barrier. *Trends Immunol* (2017).  
668
- 669 3. Van Kaer, L. & Olivares-Villagomez, D. Development, Homeostasis, and  
670 Functions of Intestinal Intraepithelial Lymphocytes. *J Immunol* **200**, 2235-2244  
671 (2018).  
672
- 673 4. Fuchs, A. *et al.* Intraepithelial type 1 innate lymphoid cells are a unique subset of  
674 IL-12- and IL-15-responsive IFN-gamma-producing cells. *Immunity* **38**, 769-781  
675 (2013).  
676
- 677 5. Talayero, P. *et al.* Innate Lymphoid Cells Groups 1 and 3 in the Epithelial  
678 Compartment of Functional Human Intestinal Allografts. *Am J Transplant* **16**, 72-  
679 82 (2016).  
680
- 681 6. Van Acker, A. *et al.* A Murine Intestinal Intraepithelial NKp46-Negative Innate  
682 Lymphoid Cell Population Characterized by Group 1 Properties. *Cell Rep* **19**,  
683 1431-1443 (2017).  
684
- 685 7. Ettersperger, J. *et al.* Interleukin-15-Dependent T-Cell-like Innate Intraepithelial  
686 Lymphocytes Develop in the Intestine and Transform into Lymphomas in Celiac  
687 Disease. *Immunity* **45**, 610-625 (2016).  
688
- 689 8. Van Kaer, L. *et al.* CD8alphaalpha(+) Innate-Type Lymphocytes in the Intestinal  
690 Epithelium Mediate Mucosal Immunity. *Immunity* **41**, 451-464 (2014).  
691
- 692 9. Edelblum, K.L. *et al.* gammadelta Intraepithelial Lymphocyte Migration Limits  
693 Transepithelial Pathogen Invasion and Systemic Disease in Mice.  
694 *Gastroenterology* **148**, 1417-1426 (2015).  
695
- 696 10. Ismail, A.S. *et al.* Gammadelta intraepithelial lymphocytes are essential  
697 mediators of host-microbial homeostasis at the intestinal mucosal surface. *Proc*  
698 *Natl Acad Sci U S A* **108**, 8743-8748 (2011).  
699
- 700 11. Inagaki-Ohara, K. *et al.* Mucosal T cells bearing TCRgammadelta play a  
701 protective role in intestinal inflammation. *J Immunol* **173**, 1390-1398 (2004).  
702
- 703 12. Chen, Y., Chou, K., Fuchs, E., Havran, W.L. & Boismenu, R. Protection of the  
704 intestinal mucosa by intraepithelial gamma delta T cells. *Proc Natl Acad Sci U S*  
705 *A* **99**, 14338-14343 (2002).  
706

- 707 13. Guy-Grand, D., DiSanto, J.P., Henchoz, P., Malassis-Seris, M. & Vassalli, P.  
708 Small bowel enteropathy: role of intraepithelial lymphocytes and of cytokines (IL-  
709 12, IFN-gamma, TNF) in the induction of epithelial cell death and renewal. *Eur J*  
710 *Immunol* **28**, 730-744 (1998).  
711
- 712 14. Poussier, P., Ning, T., Banerjee, D. & Julius, M. A unique subset of self-specific  
713 intrainestinal T cells maintains gut integrity. *J Exp Med* **195**, 1491-1497 (2002).  
714
- 715 15. Lepage, A.C., Buzoni-Gatel, D., Bout, D.T. & Kasper, L.H. Gut-derived  
716 intraepithelial lymphocytes induce long term immunity against *Toxoplasma*  
717 *gondii*. *J Immunol* **161**, 4902-4908 (1998).  
718
- 719 16. Masopust, D. *et al.* Dynamic T cell migration program provides resident memory  
720 within intestinal epithelium. *J Exp Med* **207**, 553-564 (2010).  
721
- 722 17. Masopust, D., Jiang, J., Shen, H. & Lefrancois, L. Direct analysis of the dynamics  
723 of the intestinal mucosa CD8 T cell response to systemic virus infection. *J*  
724 *Immunol* **166**, 2348-2356 (2001).  
725
- 726 18. Das, G. *et al.* An important regulatory role for CD4+CD8 alpha alpha T cells in  
727 the intestinal epithelial layer in the prevention of inflammatory bowel disease.  
728 *Proc Natl Acad Sci U S A* **100**, 5324-5329. PMC1535703 (2003).  
729
- 730 19. Kumar, A.A., Delgado, A.G., Piazuelo, M.B., Van Kaer, L. & Olivares-Villagomez,  
731 D. Innate CD8alphaalpha(+) lymphocytes enhance anti-CD40 antibody-mediated  
732 colitis in mice. *Immun Inflamm Dis* **5**, 109-123 (2017).  
733
- 734 20. Franzen, A. & Heinegard, D. Isolation and characterization of two sialoproteins  
735 present only in bone calcified matrix. *Biochem J* **232**, 715-724 (1985).  
736
- 737 21. Prince, C.W. *et al.* Isolation, characterization, and biosynthesis of a  
738 phosphorylated glycoprotein from rat bone. *J Biol Chem* **262**, 2900-2907 (1987).  
739
- 740 22. Lund, S.A. *et al.* Osteopontin mediates macrophage chemotaxis via alpha4 and  
741 alpha9 integrins and survival via the alpha4 integrin. *J Cell Biochem* **114**, 1194-  
742 1202 (2013).  
743
- 744 23. Ashkar, S. *et al.* Eta-1 (osteopontin): an early component of type-1 (cell-  
745 mediated) immunity. *Science* **287**, 860-864 (2000).  
746
- 747 24. Hur, E.M. *et al.* Osteopontin-induced relapse and progression of autoimmune  
748 brain disease through enhanced survival of activated T cells. *Nat Immunol* **8**, 74-  
749 83 (2007).  
750



- 751 25. Leavenworth, J.W., Verbinnen, B., Wang, Q., Shen, E. & Cantor, H. Intracellular  
752 osteopontin regulates homeostasis and function of natural killer cells. *Proc Natl*  
753 *Acad Sci U S A* **112**, 494-499 (2015).  
754
- 755 26. Shinohara, M.L., Kim, H.J., Kim, J.H., Garcia, V.A. & Cantor, H. Alternative  
756 translation of osteopontin generates intracellular and secreted isoforms that  
757 mediate distinct biological activities in dendritic cells. *Proc Natl Acad Sci U S A*  
758 **105**, 7235-7239 (2008).  
759
- 760 27. Oz, H.S., Zhong, J. & de Villiers, W.J. Osteopontin ablation attenuates  
761 progression of colitis in TNBS model. *Dig Dis Sci* **57**, 1554-1561 (2012).  
762
- 763 28. Zhong, J., Eckhardt, E.R., Oz, H.S., Bruemmer, D. & de Villiers, W.J.  
764 Osteopontin deficiency protects mice from Dextran sodium sulfate-induced  
765 colitis. *Inflamm Bowel Dis* **12**, 790-796 (2006).  
766
- 767 29. Sato, T. *et al.* Osteopontin/Eta-1 upregulated in Crohn's disease regulates the  
768 Th1 immune response. *Gut* **54**, 1254-1262 (2005).  
769
- 770 30. Mishima, R. *et al.* High plasma osteopontin levels in patients with inflammatory  
771 bowel disease. *J Clin Gastroenterol* **41**, 167-172 (2007).  
772
- 773 31. Gassler, N. *et al.* Expression of osteopontin (Eta-1) in Crohn disease of the  
774 terminal ileum. *Scand J Gastroenterol* **37**, 1286-1295 (2002).  
775
- 776 32. Masuda, H., Takahashi, Y., Asai, S. & Takayama, T. Distinct gene expression of  
777 osteopontin in patients with ulcerative colitis. *J Surg Res* **111**, 85-90 (2003).  
778
- 779 33. Neuman, M.G. Osteopontin biomarker in inflammatory bowel disease, animal  
780 models and target for drug discovery. *Dig Dis Sci* **57**, 1430-1431 (2012).  
781
- 782 34. Boumans, M.J. *et al.* Safety, tolerability, pharmacokinetics, pharmacodynamics  
783 and efficacy of the monoclonal antibody ASK8007 blocking osteopontin in  
784 patients with rheumatoid arthritis: a randomised, placebo controlled, proof-of-  
785 concept study. *Annals of the rheumatic diseases* **71**, 180-185 (2012).  
786
- 787 35. Ito, K. *et al.* The potential role of Osteopontin in the maintenance of commensal  
788 bacteria homeostasis in the intestine. *PLoS One* **12**, e0173629 (2017).  
789
- 790 36. Weber, G.F., Ashkar, S., Glimcher, M.J. & Cantor, H. Receptor-ligand interaction  
791 between CD44 and osteopontin (Eta-1). *Science* **271**, 509-512 (1996).  
792
- 793 37. Beura, L.K. *et al.* Normalizing the environment recapitulates adult human  
794 immune traits in laboratory mice. *Nature* **532**, 512-516 (2016).  
795

- 796 38. Smolewski, P. & Robak, T. Inhibitors of apoptosis proteins (IAPs) as potential  
797 molecular targets for therapy of hematological malignancies. *Curr Mol Med* **11**,  
798 633-649 (2011).  
799
- 800 39. Kim, S., Shevde, N.K. & Pike, J.W. 1,25-Dihydroxyvitamin D3 stimulates cyclic  
801 vitamin D receptor/retinoid X receptor DNA-binding, co-activator recruitment, and  
802 histone acetylation in intact osteoblasts. *J Bone Miner Res* **20**, 305-317 (2005).  
803
- 804 40. Olivares-Villagomez, D. & Van Kaer, L. TL and CD8alphaalpha: Enigmatic  
805 partners in mucosal immunity. *Immunol Lett* **134**, 1-6 (2010).  
806
- 807 41. Olivares-Villagomez, D. *et al.* Thymus leukemia antigen controls intraepithelial  
808 lymphocyte function and inflammatory bowel disease. *Proc Natl Acad Sci U S A*  
809 **105**, 17931-17936. PMC2584730 (2008).  
810
- 811 42. Bollyky, P.L. *et al.* CD44 costimulation promotes FoxP3+ regulatory T cell  
812 persistence and function via production of IL-2, IL-10, and TGF-beta. *J Immunol*  
813 **183**, 2232-2241 (2009).  
814
- 815 43. Maki, K. *et al.* Interleukin 7 receptor-deficient mice lack gammadelta T cells. *Proc*  
816 *Natl Acad Sci U S A* **93**, 7172-7177. PMC38955 (1996).  
817
- 818 44. Kennedy, M.K. *et al.* Reversible defects in natural killer and memory CD8 T cell  
819 lineages in interleukin 15-deficient mice. *J Exp Med* **191**, 771-780 (2000).  
820
- 821 45. Montufar-Solis, D., Garza, T. & Klein, J.R. T-cell activation in the intestinal  
822 mucosa. *Immunol Rev* **215**, 189-201. PMC2754816 (2007).  
823
- 824 46. Powrie, F., Correa-Oliveira, R., Mauze, S. & Coffman, R.L. Regulatory  
825 interactions between CD45RB<sup>high</sup> and CD45RB<sup>low</sup> CD4<sup>+</sup> T cells are important  
826 for the balance between protective and pathogenic cell-mediated immunity. *J Exp*  
827 *Med* **179**, 589-600. PMC2191378 (1994).  
828
- 829 47. Powrie, F. *et al.* Inhibition of Th1 responses prevents inflammatory bowel disease  
830 in scid mice reconstituted with CD45RB<sup>hi</sup> CD4<sup>+</sup> T cells. *Immunity* **1**, 553-562  
831 (1994).  
832
- 833 48. Kanayama, M. *et al.* Skewing of the population balance of lymphoid and myeloid  
834 cells by secreted and intracellular osteopontin. *Nat Immunol* **18**, 973-984 (2017).  
835
- 836 49. Farrokhi, V., Chabot, J.R., Neubert, H. & Yang, Z. Assessing the Feasibility of  
837 Neutralizing Osteopontin with Various Therapeutic Antibody Modalities. *Sci Rep*  
838 **8**, 7781 (2018).  
839

- 840 50. Hoek, K.L. *et al.* A cell-based systems biology assessment of human blood to  
841 monitor immune responses after influenza vaccination. *PLoS One* **10**, e0118528  
842 (2015).  
843
- 844 51. Weitkamp, J.H. *et al.* Necrotising enterocolitis is characterised by disrupted  
845 immune regulation and diminished mucosal regulatory (FOXP3)/effector (CD4,  
846 CD8) T cell ratios. *Gut* **62**, 73-82 (2013).  
847
- 848 52. Patro, R., Duggal, G., Love, M.I., Irizarry, R.A. & Kingsford, C. Salmon provides  
849 fast and bias-aware quantification of transcript expression. *Nature methods* **14**,  
850 417-419 (2017).  
851
- 852 53. Robinson, M.D., McCarthy, D.J. & Smyth, G.K. edgeR: a Bioconductor package  
853 for differential expression analysis of digital gene expression data. *Bioinformatics*  
854 **26**, 139-140 (2010).  
855
- 856 54. Subramanian, A. *et al.* Gene set enrichment analysis: a knowledge-based  
857 approach for interpreting genome-wide expression profiles. *Proc Natl Acad Sci U*  
858 *S A* **102**, 15545-15550 (2005).  
859  
860

**a**

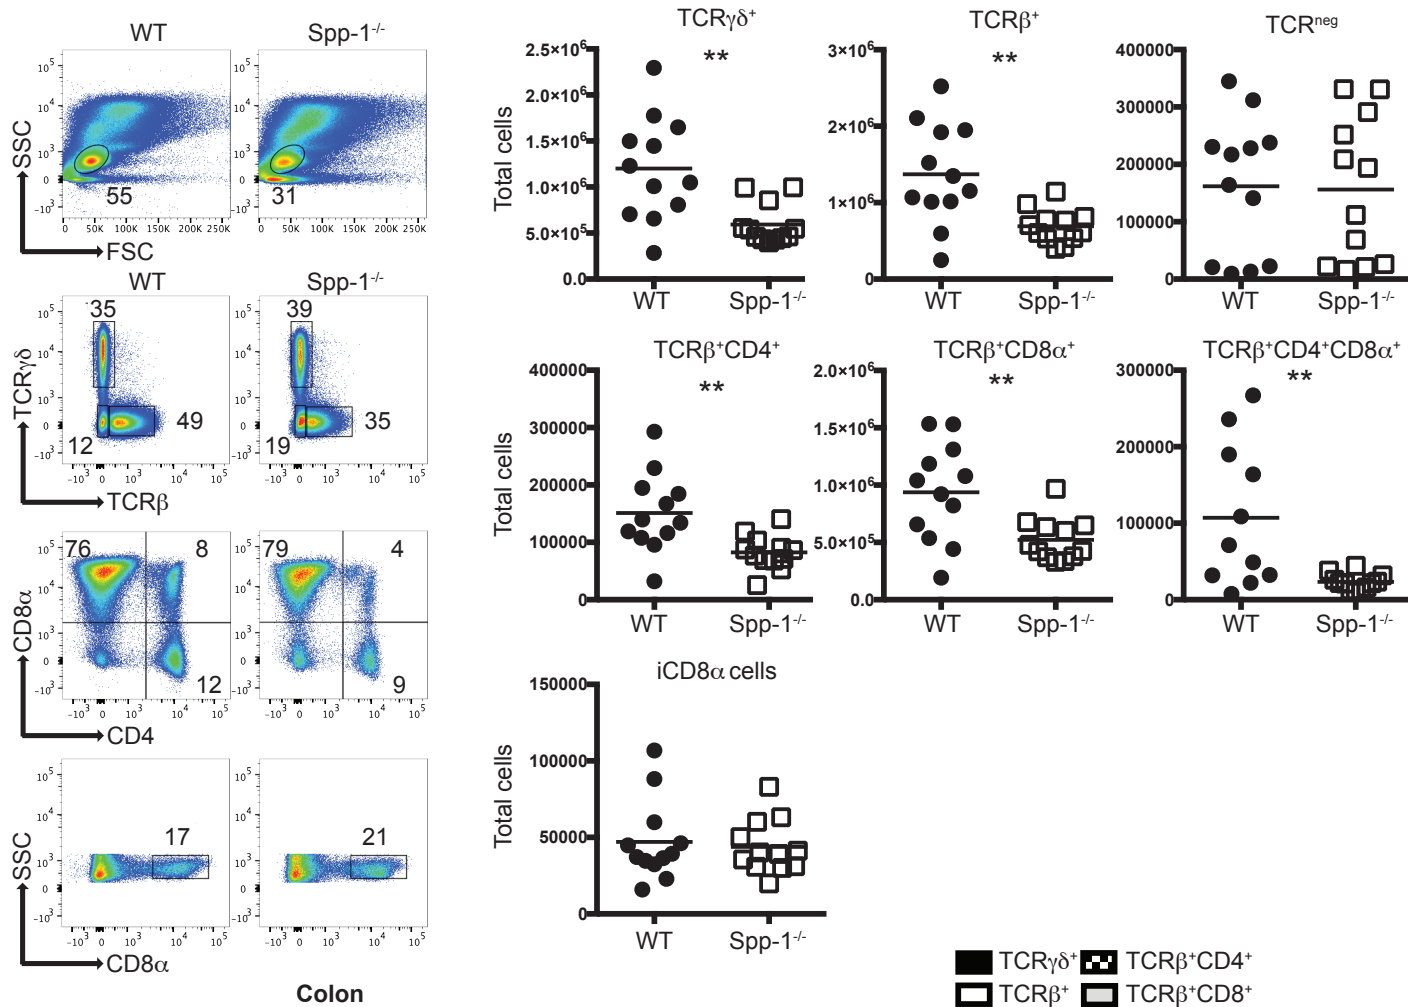

**Colon**

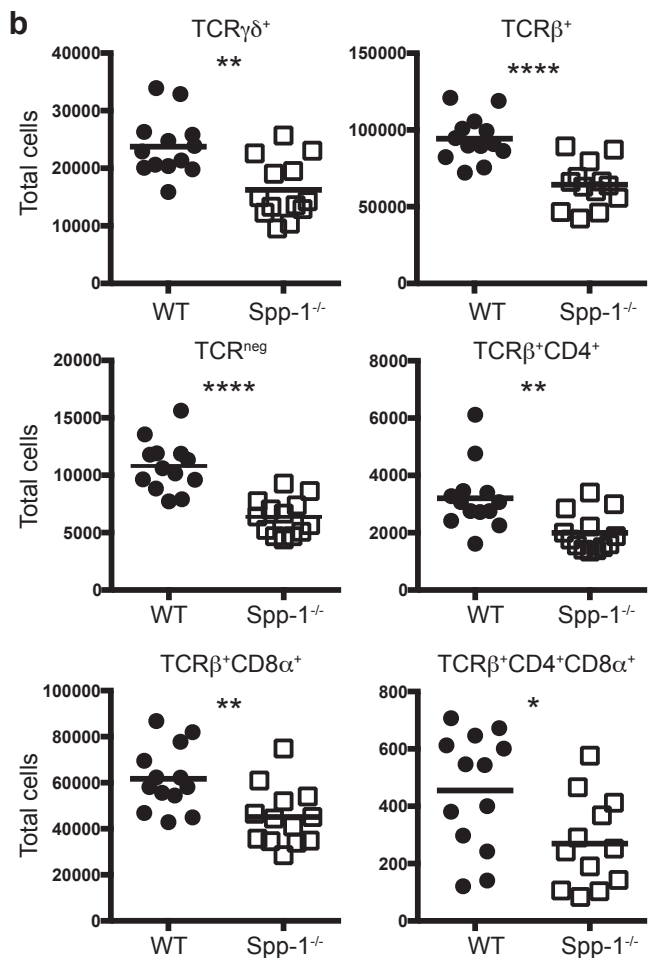

**c**

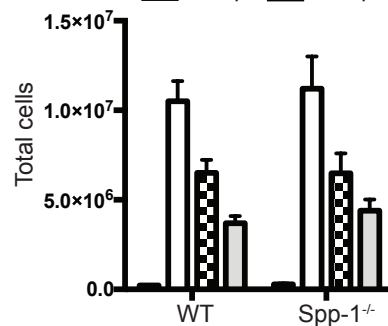

**d**

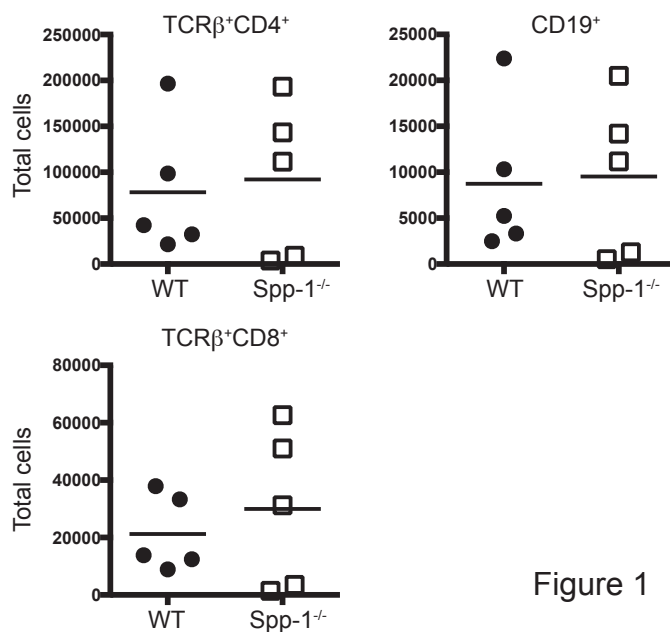

Figure 1

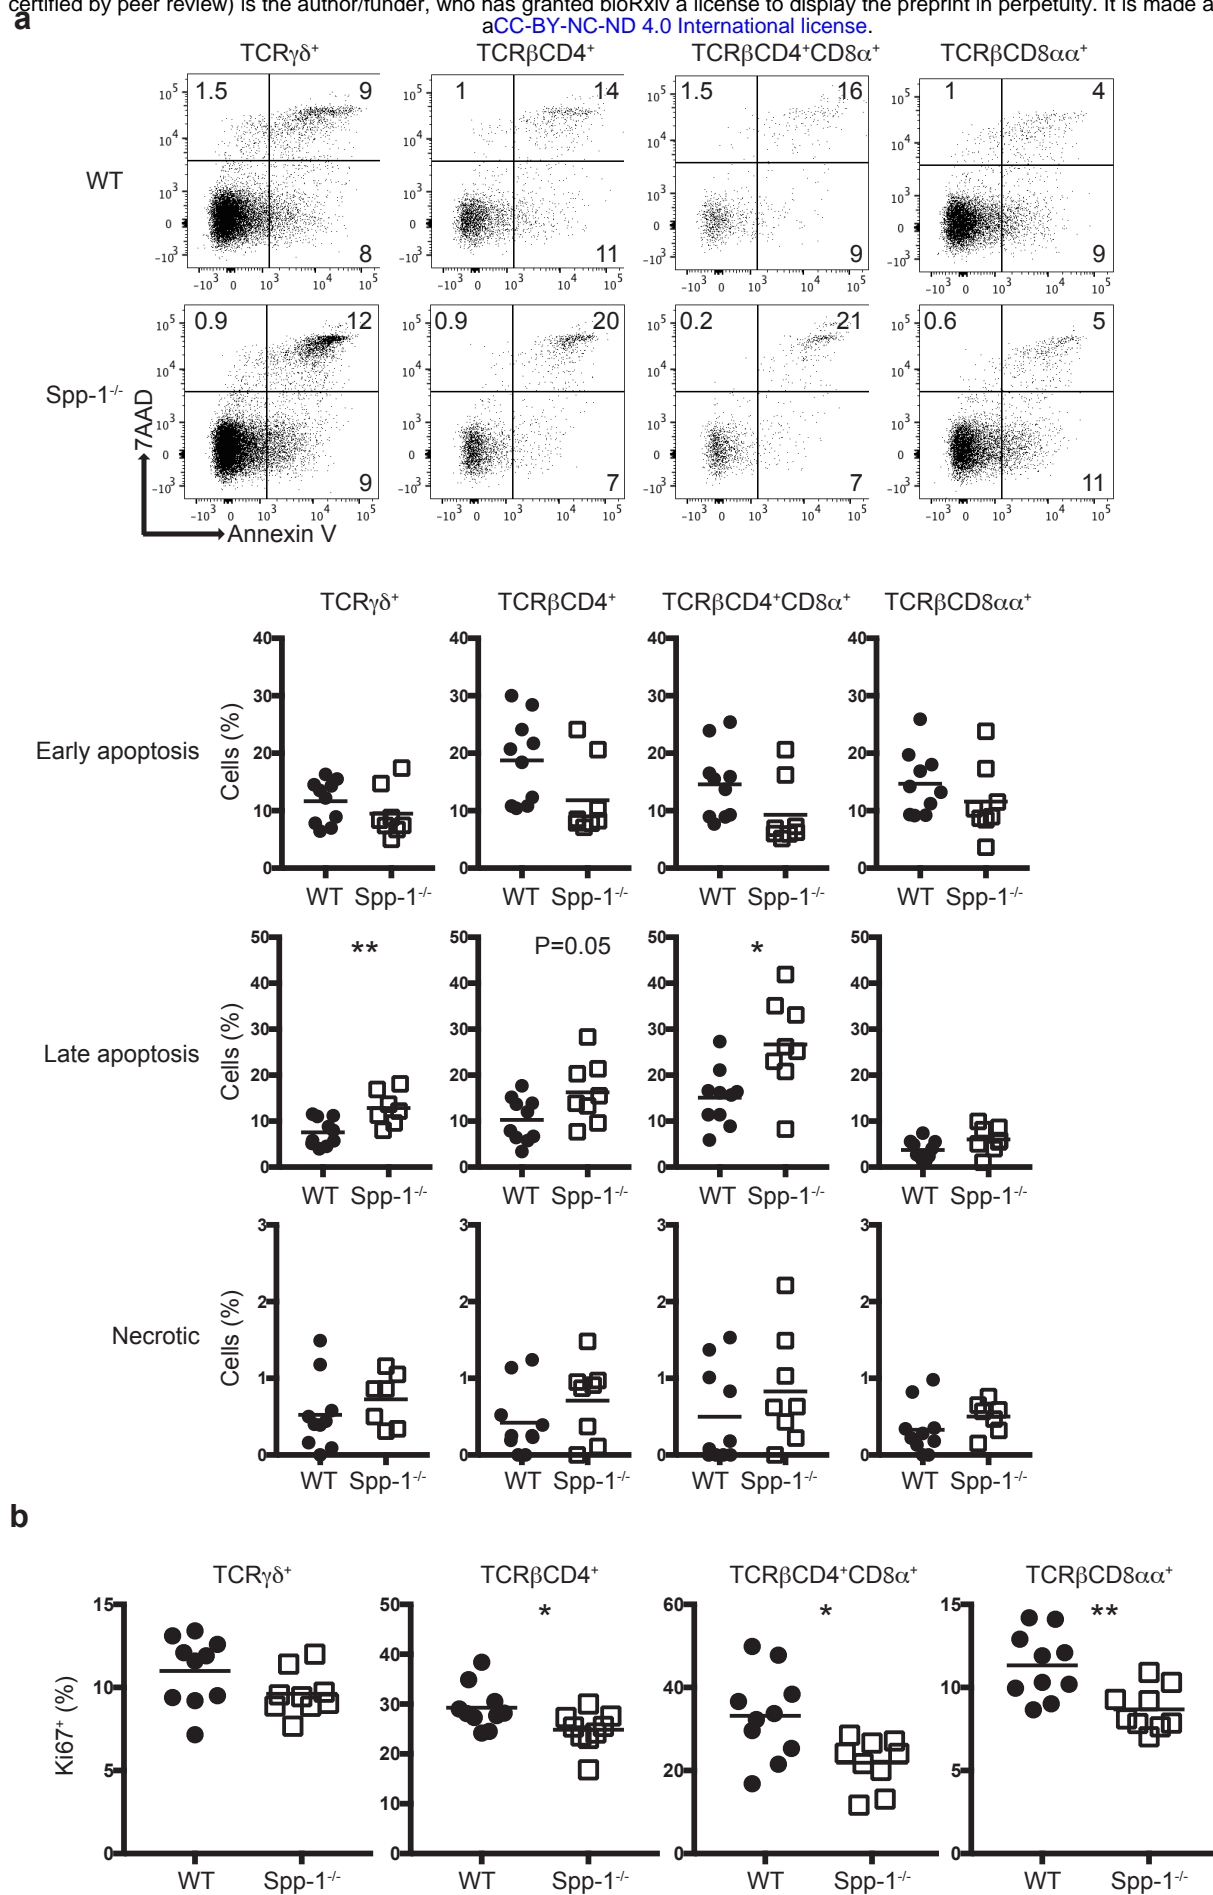

Figure 2

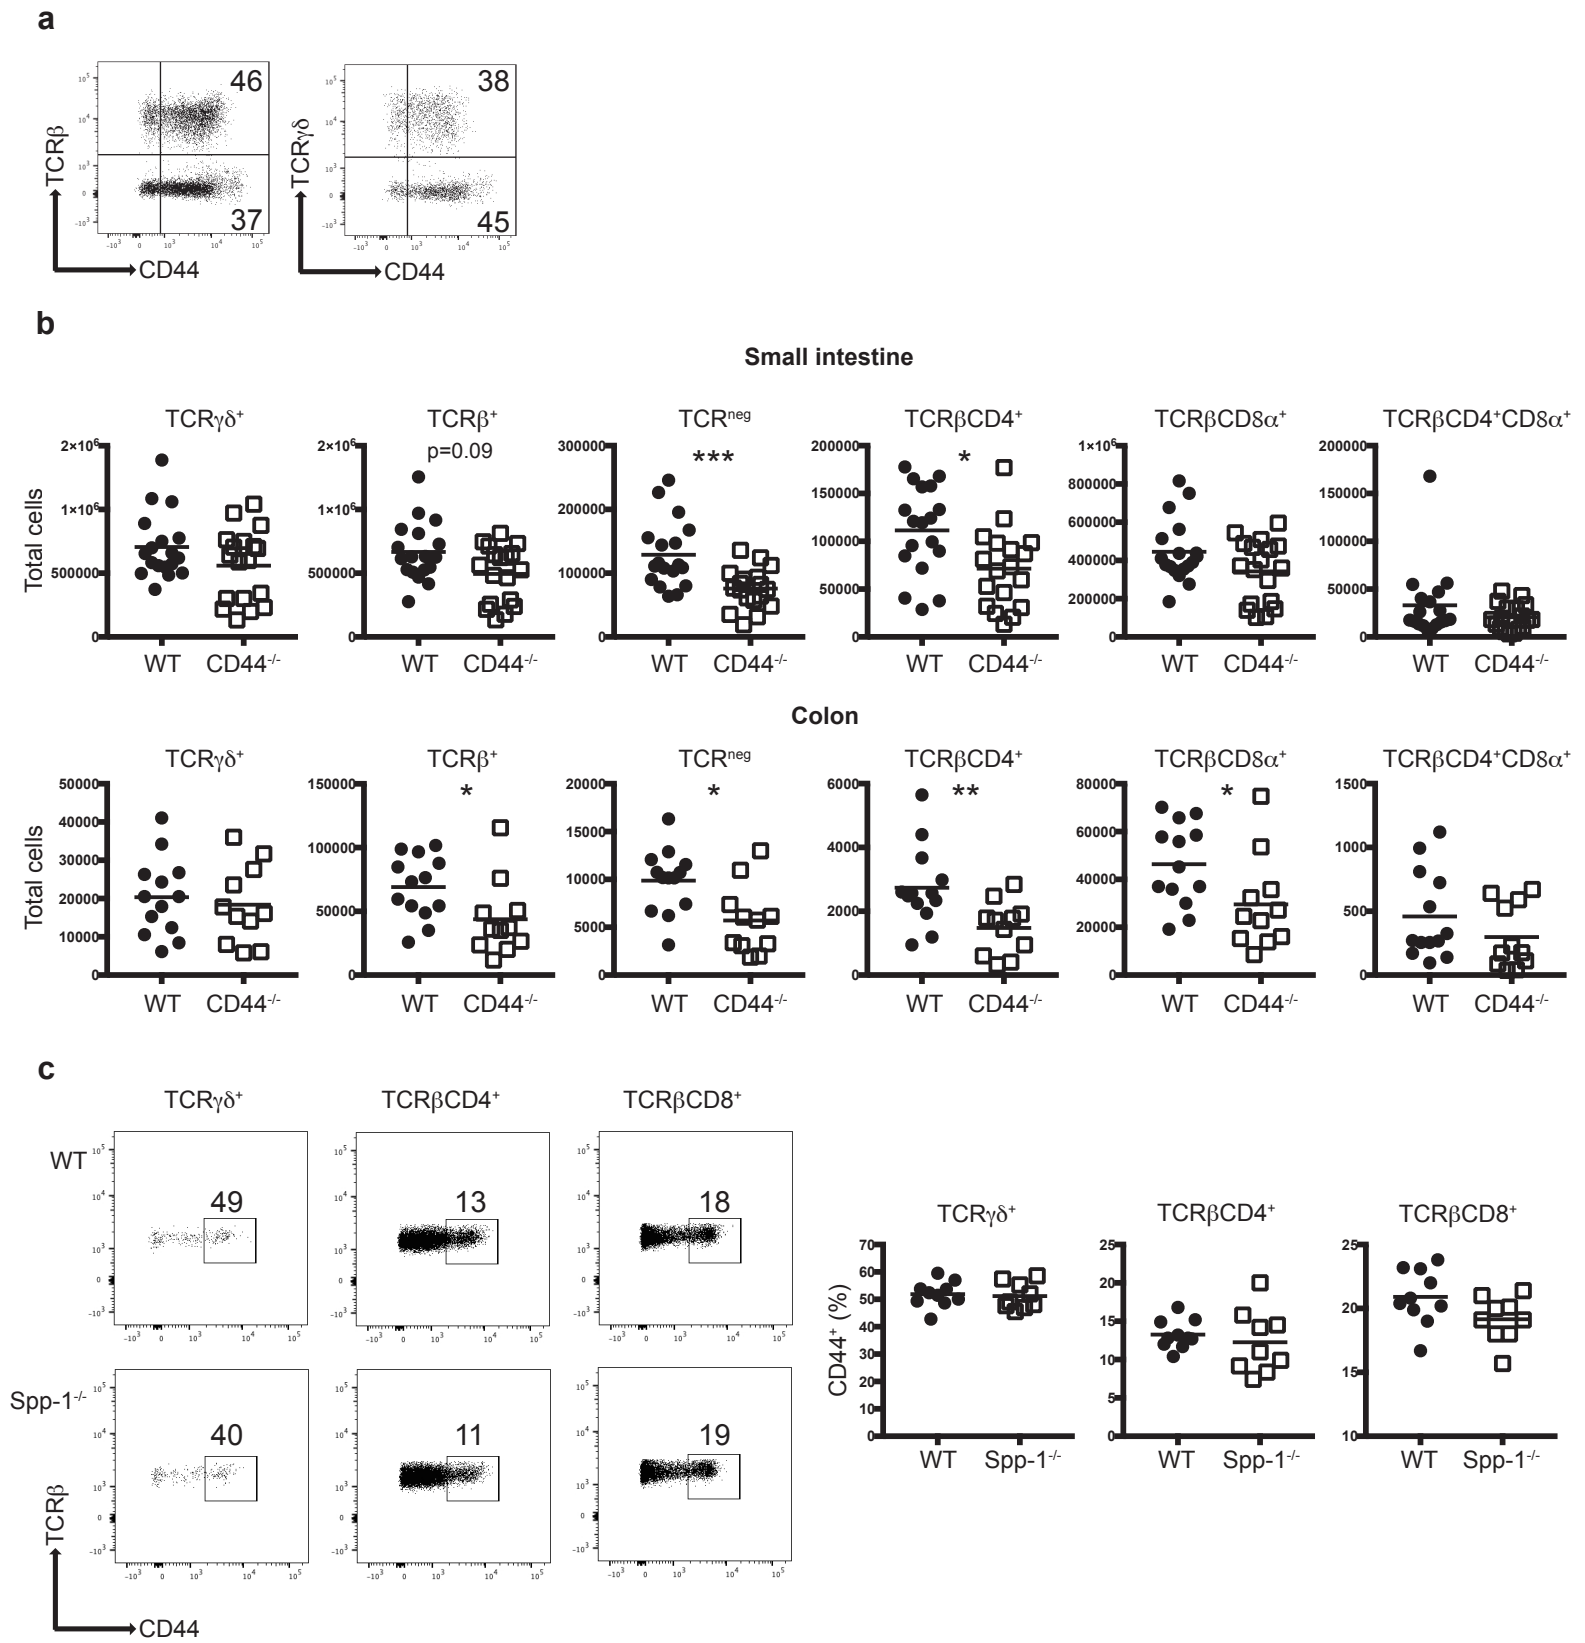

Figure 3

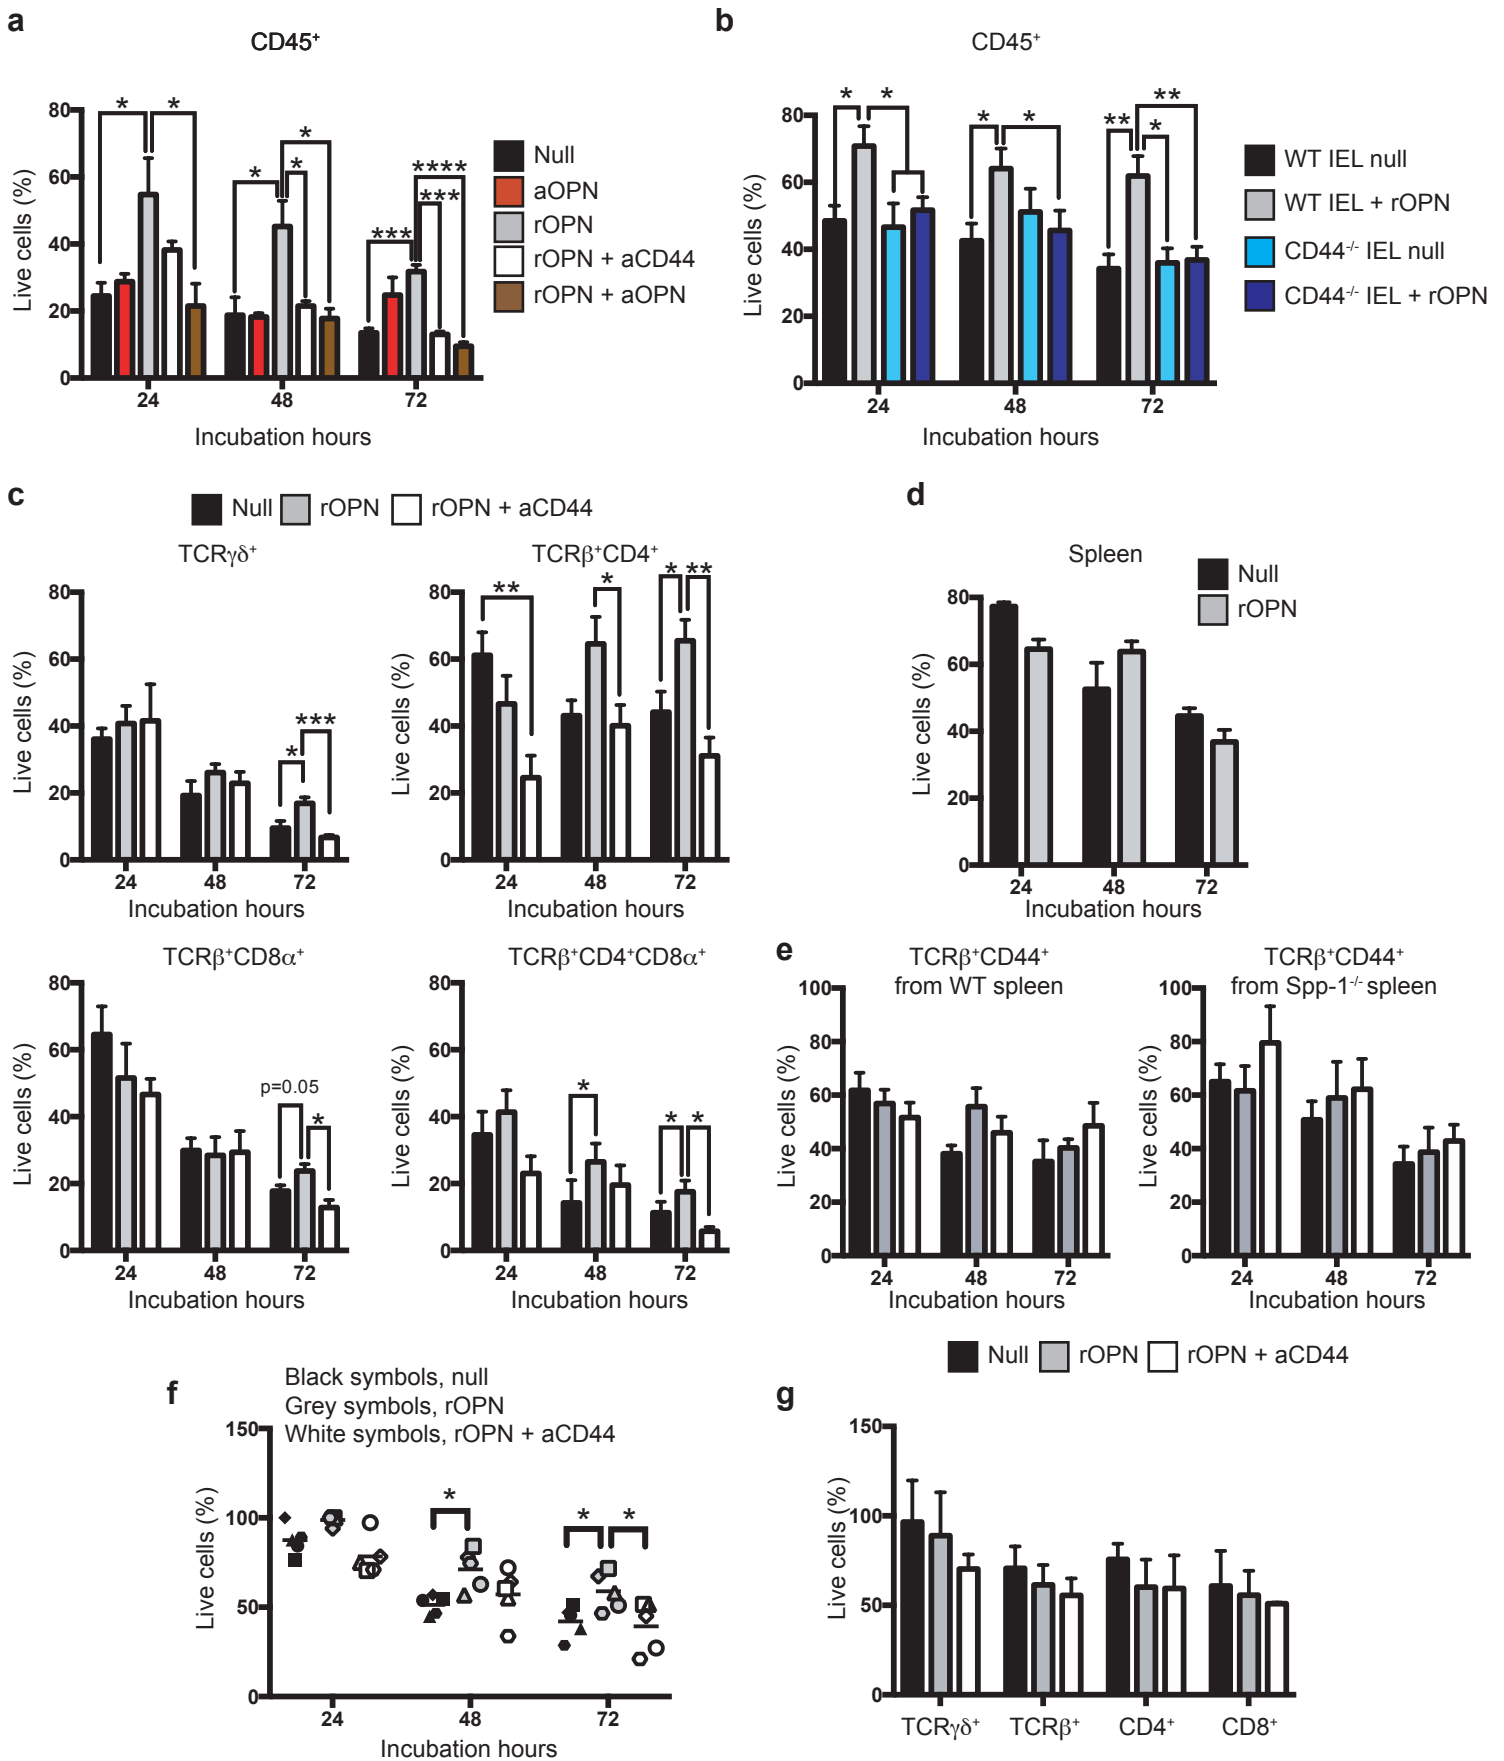

Figure 4

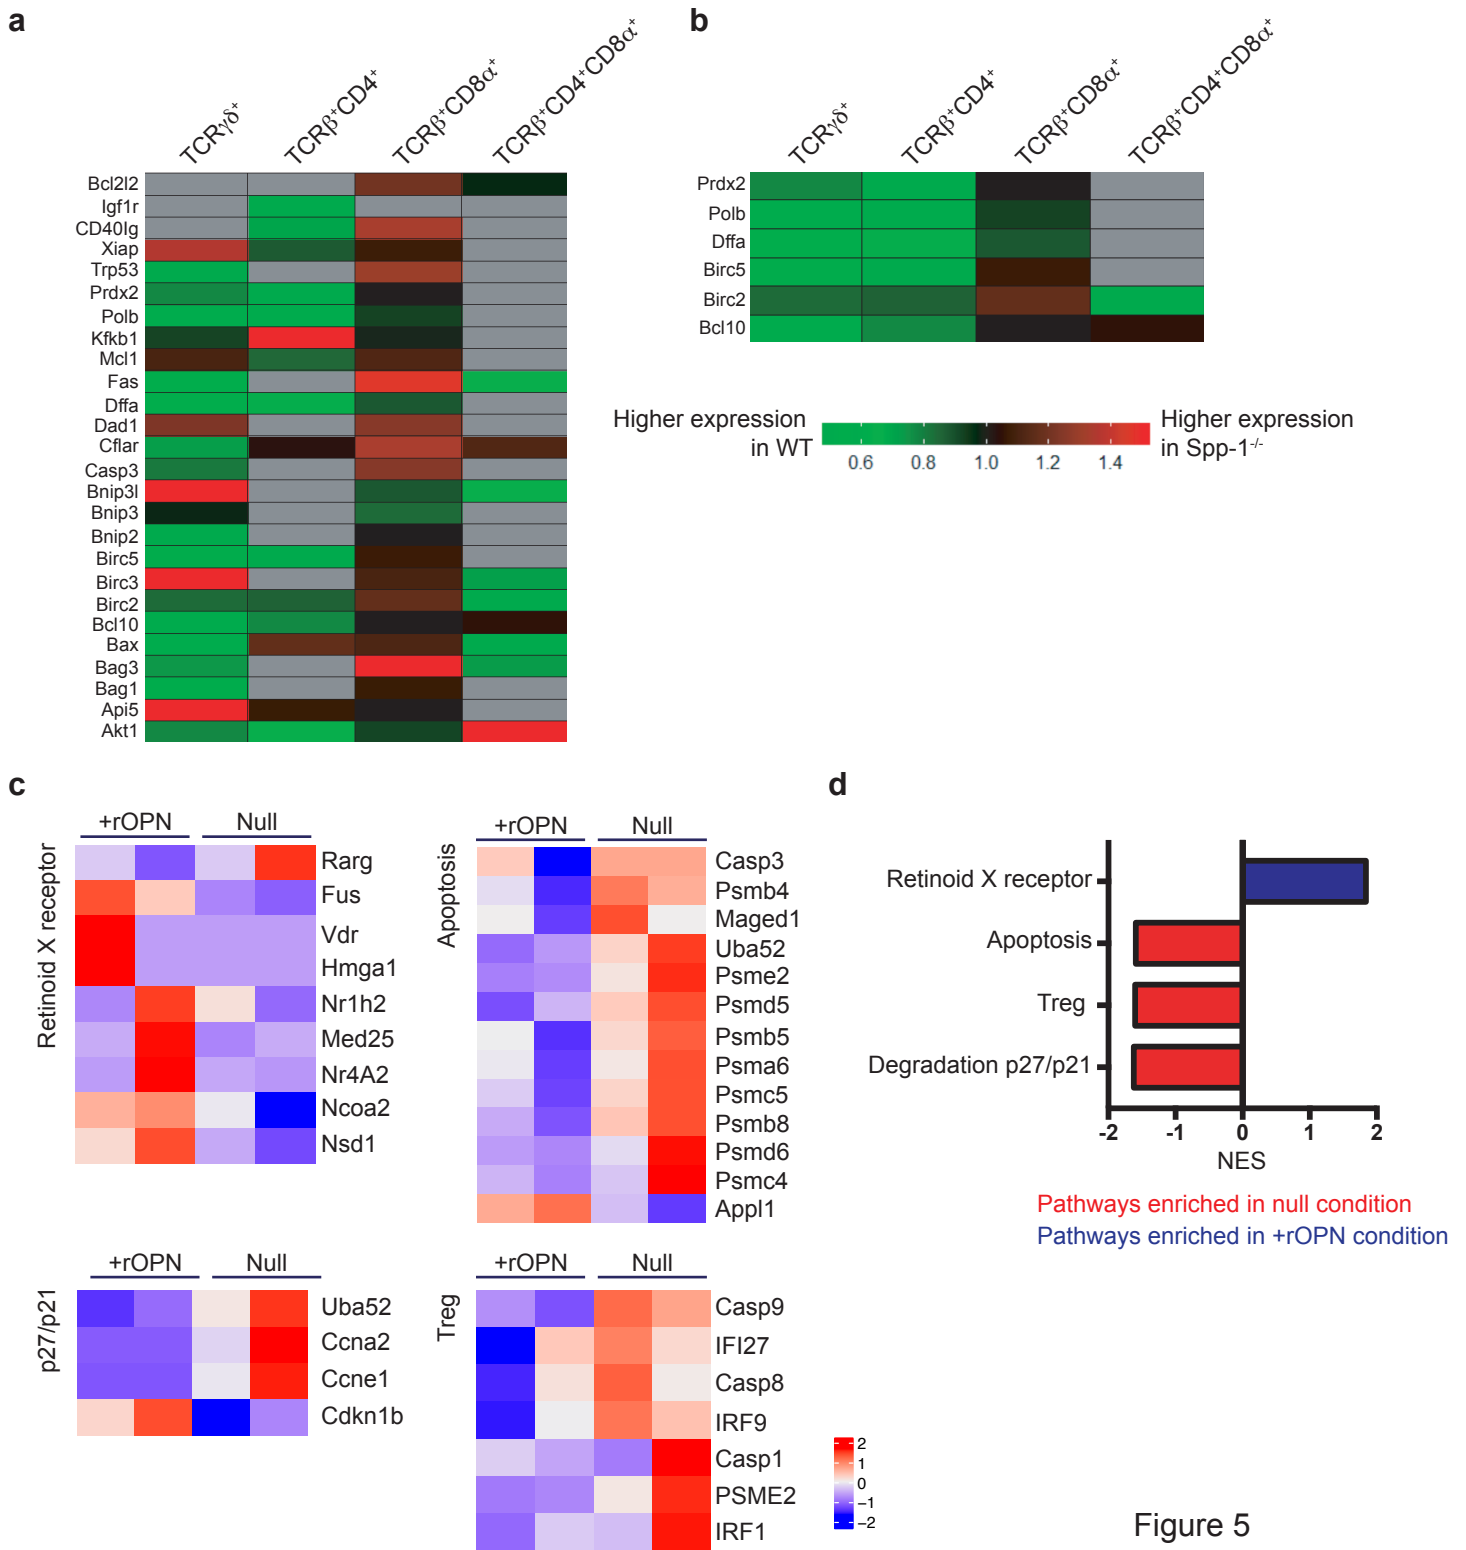



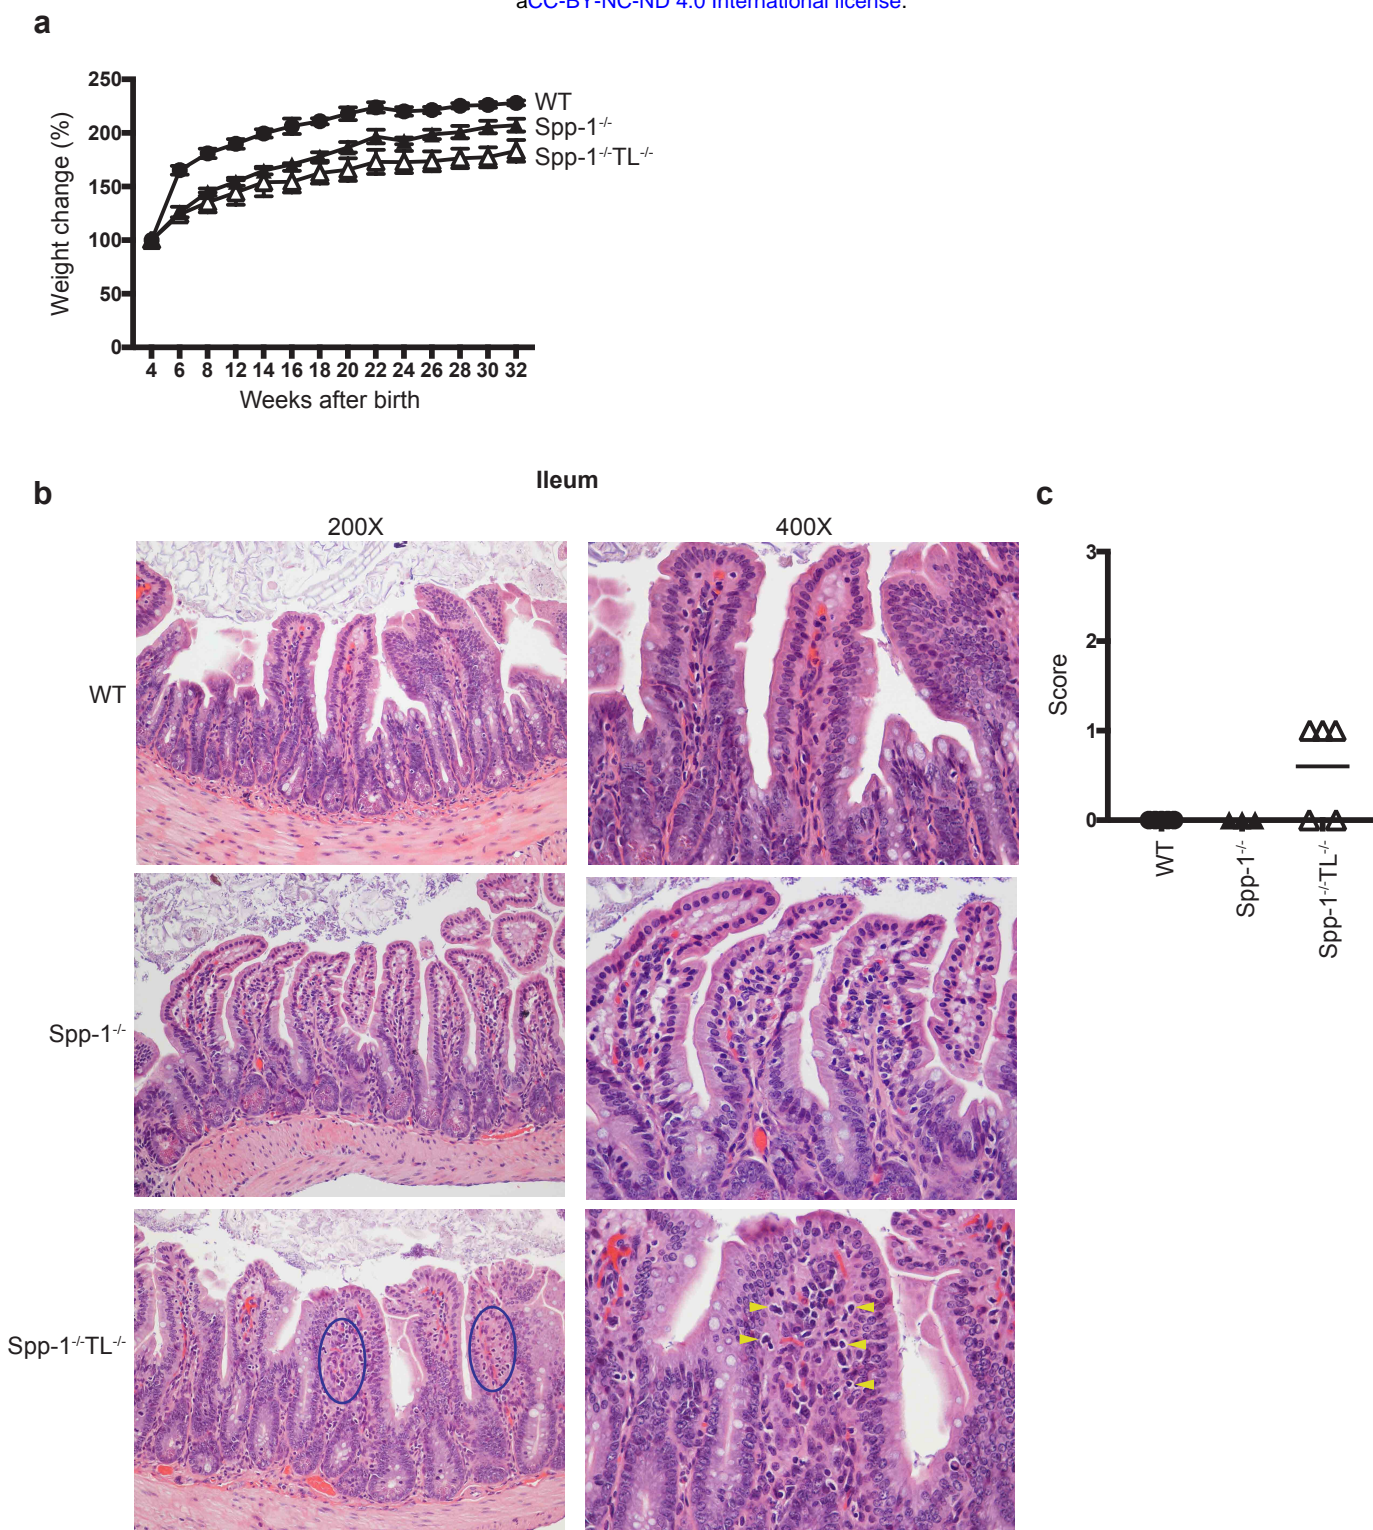

Figure 6

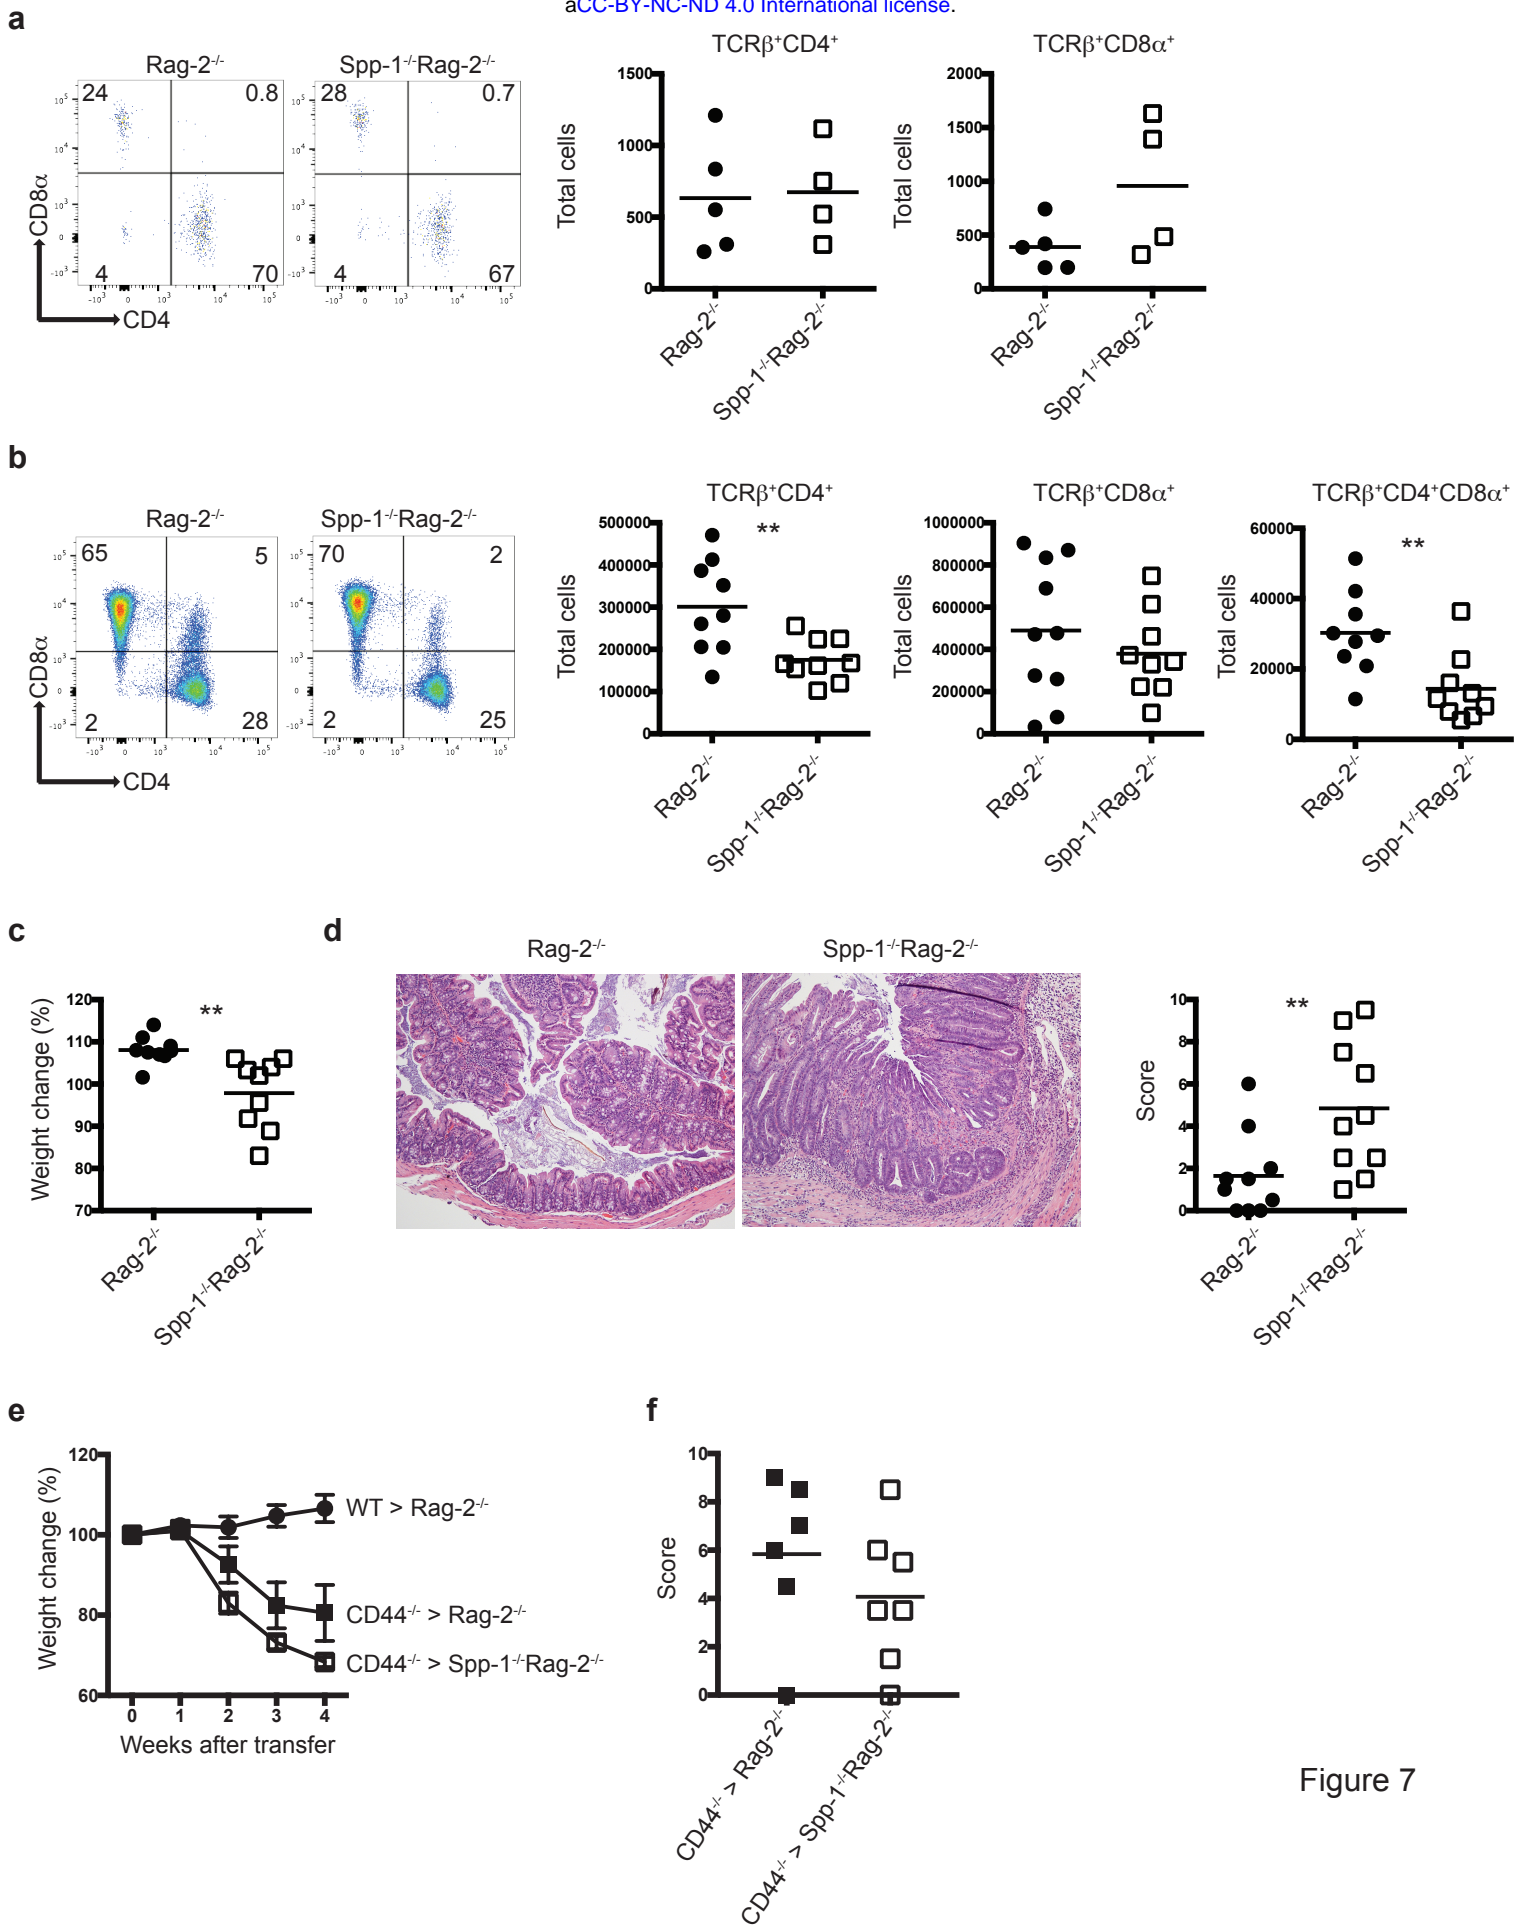

Figure 7

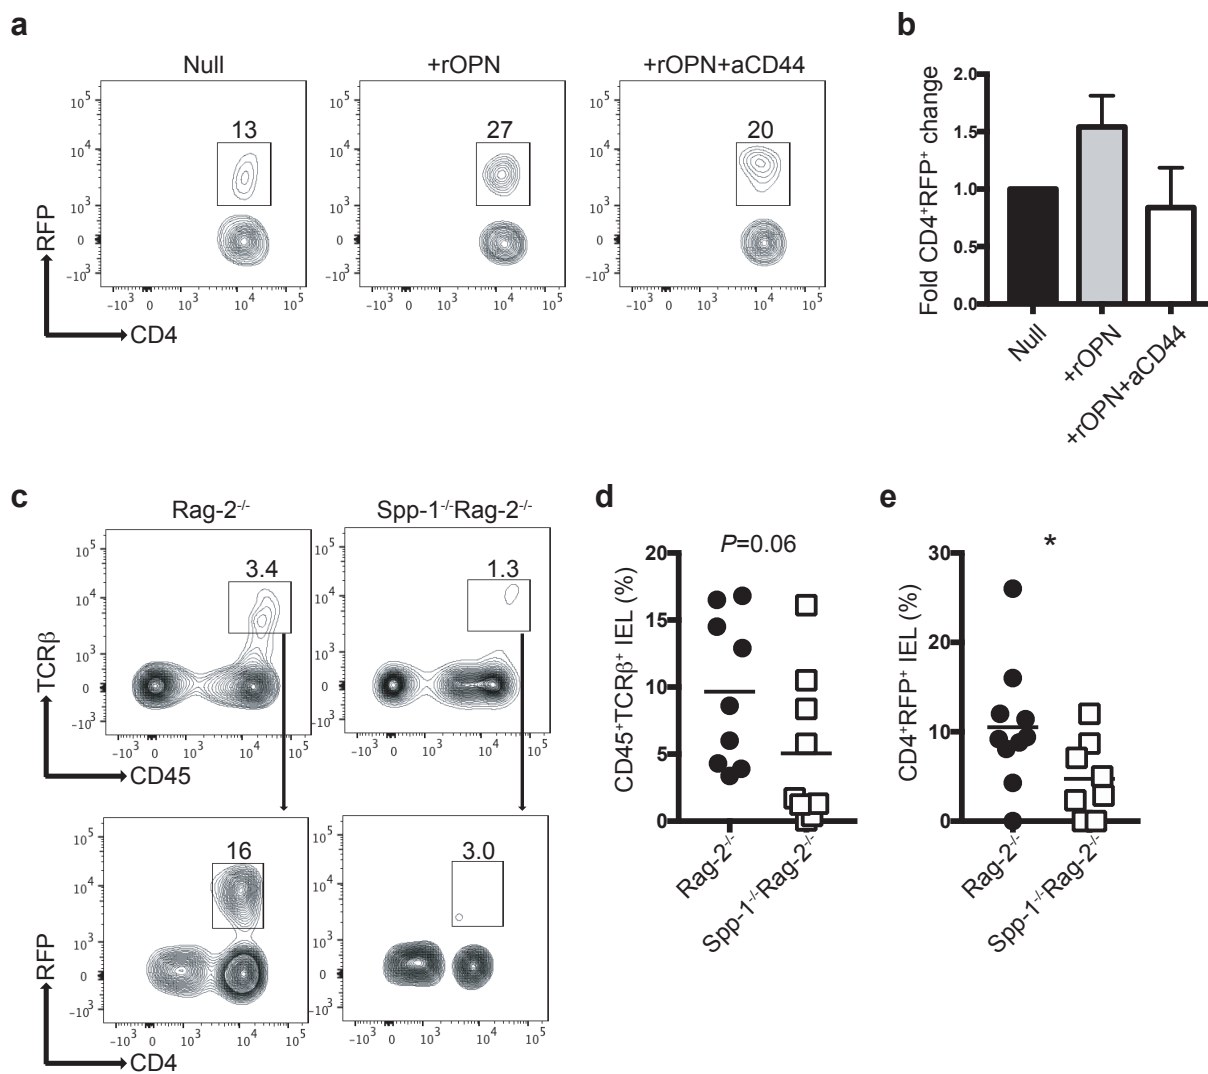

Figure 8
